# Supplementary material
Source: PubMed Central journal article supplement (PMC7733858)
Supplement: pnas.1920338117.sapp.pdf [file pnas.1920338117.sapp.pdf]

# PNAS

www.pnas.org

Supplementary Information for

Inhibition of 3-phosphoinositide-dependent protein kinase 1 (PDK1) can revert cellular senescence in human dermal fibroblasts

Sugyun An<sup>1,†</sup>, Si-Young Cho<sup>2,†</sup>, Junsoo Kang<sup>1</sup>, Soobeom Lee<sup>1</sup>, Hyung-Su Kim<sup>2</sup>, Dae-Jin Min<sup>2</sup>, EuiDong Son<sup>2</sup> and Kwang-Hyun Cho<sup>1\*</sup>

<sup>1</sup>Department of Bio and Brain Engineering, Korea Advanced Institute of Science and Technology (KAIST), Daejeon, Republic of Korea.

<sup>2</sup>AMOREPACIFIC Corp. R&D Unit, Gyeonggi-do, Republic of Korea

<sup>†</sup>S.A., and S.-Y.C. contributed equally to this study.

\*Corresponding author. E-mail: [ckh@kaist.ac.kr](mailto:ckh@kaist.ac.kr), Phone: +82-42-350-4325, Fax: +82-42-350-4310, Web: <http://sbie.kaist.ac.kr/>

**This PDF file includes:**

Figures S1 to S19  
Tables S1 to S10  
Legends for Dataset S1 to S2

**Other supplementary materials for this manuscript include the followings:**

Dataset S1 to S2

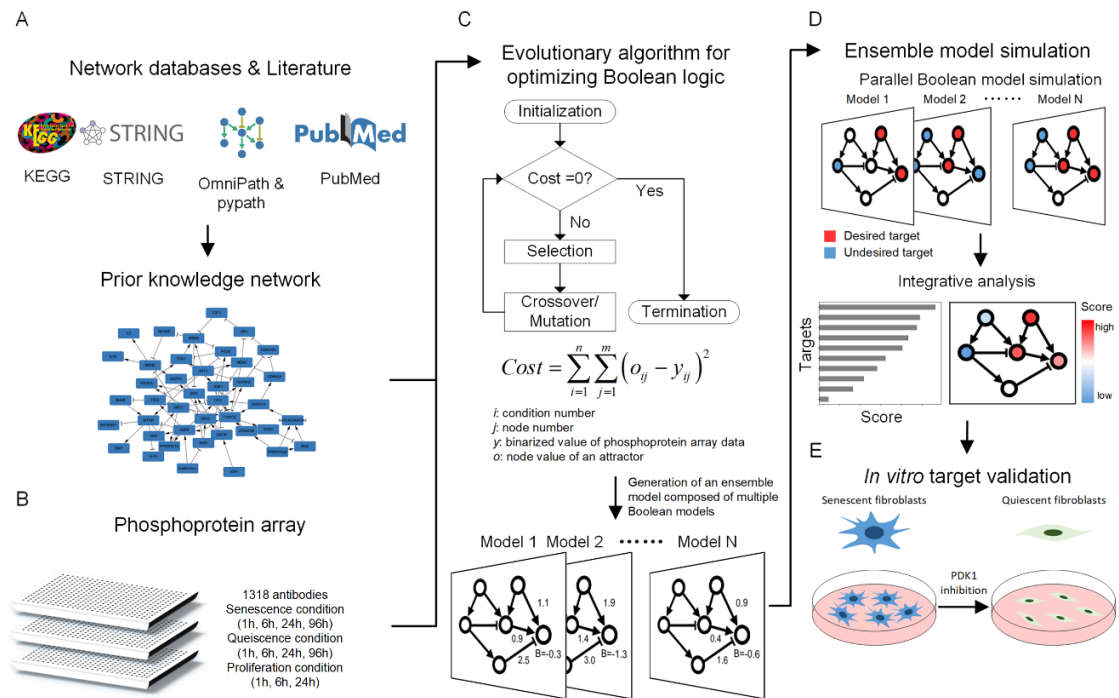

**Fig. S1. Overview of network modeling, simulation, and validation.** (A) Construction of a prior knowledge network. (B) Measurement of phosphoproteins in normal human dermal fibroblasts (NHDFs). Time-series phosphoprotein arrays were conducted for the senescence condition, quiescence condition, and proliferation condition. (C) Inference of Boolean logic of the cellular senescence network using an evolutionary algorithm. The cost function of the evolutionary algorithm is the sum of mean square error between protein states of binarized phosphoprotein array data and node states of attractors. Multiple Boolean network models that were optimized to the binarized phosphoprotein array data were generated and analyzed as an ensemble model. (D) Integrative analysis of the ensemble model for target identification. Inhibition simulations were conducted in each Boolean model and integrated into a score. (E) Experimental validation of senescence-to-quiescence inhibition target. The effect of PDK1 inhibition was measured in NHDFs.

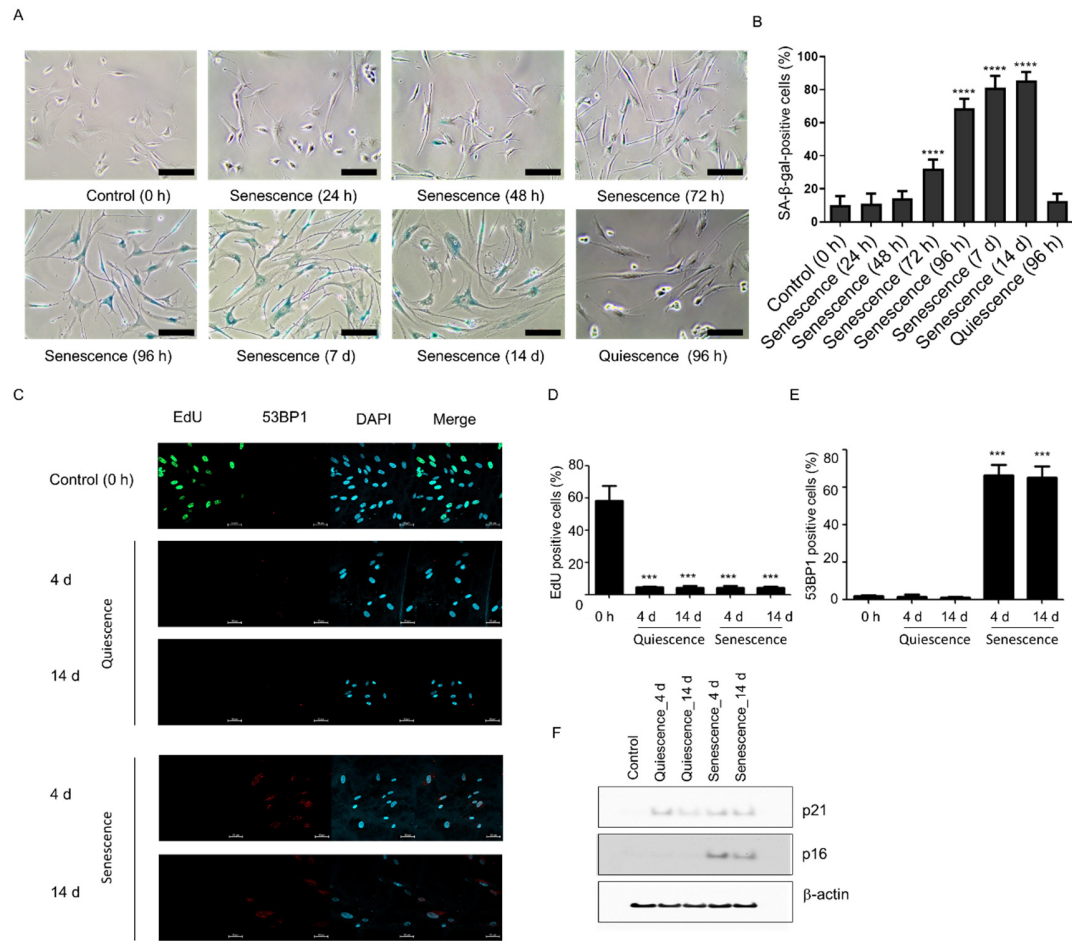

**Fig. S2. Combination treatment of IGF-1 with doxorubicin effectively induces senescence in NHDFs.** For induced senescence condition, NHDFs (PDL 12) were cultured in DMEM (4.5 g/L glucose) supplemented with 10% FBS, doxorubicin (100 ng/ml) and IGF-1 (100 ng/ml) for the indicated time. For induced quiescence condition, NHDFs (PDL 12) were cultured in DMEM (1 g/L glucose) supplemented with 1% FBS and doxorubicin (100 ng/ml) for the indicated time. NHDFs (PDL12) grown in DMEM (4.5 g/L glucose) media with 10% FBS were used as control. (A) Representative images of SA-β-gal staining activity. Scale bar= 500μm. (B) Bar diagram showing percentage of SA-β-gal positive cells. Mean ± SD (n=5), \*\*\* P < 0.001 compared to 0 h control senescent cells by one-way analysis of variance. (C) Representative immunofluorescent images of NHDFs stained for EdU (proliferating cells) and 53BP1 (cells with active DNA damage response). Scale bar = 50 μm. (D) Quantification of EdU as percentage of cells with positive staining. (E) Quantification of 53BP1-positive cells as percentage of cells with positive nuclear staining. For D and E, data are shown as mean ± SD (n=5), \*\*\* P < 0.001 compared with 0 h control cells by one-way analysis of variance. (F) Representative immunoblots showing the expression of p21 and p16. Data are representative of at least two independent experiments.

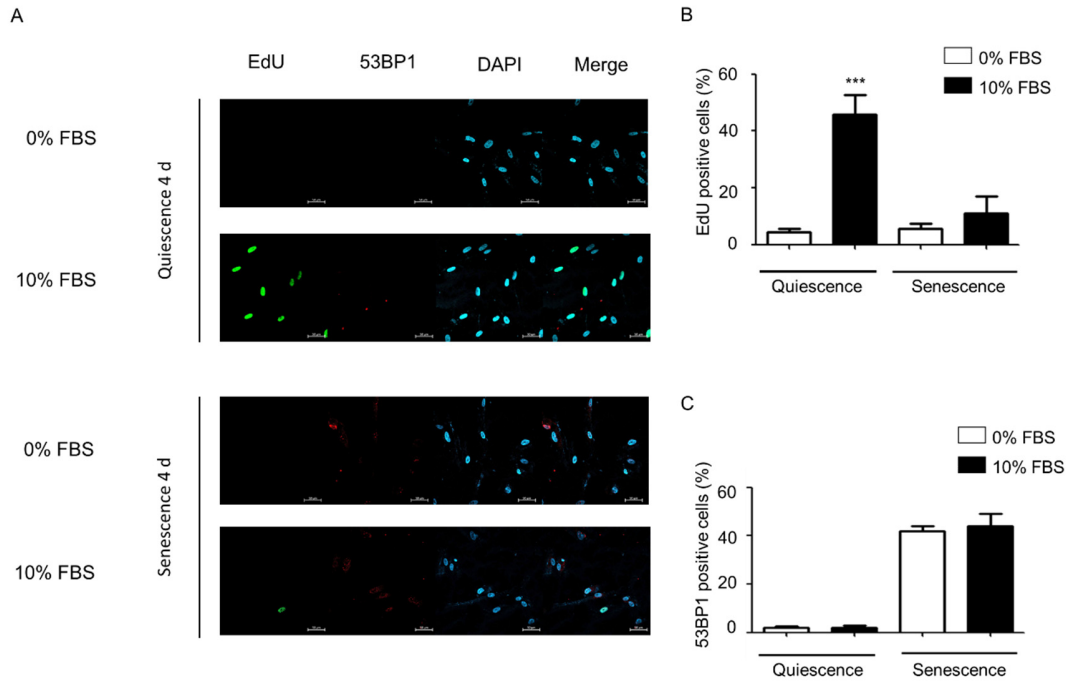

**Fig. S3. The effects of doxorubicin alone or in combination with IGF-1 on senescence in NHDFs.** For induced senescence condition, NHDFs (PDL 12) were cultured in DMEM (4.5 g/L glucose) supplemented with 10% FBS, doxorubicin (100 ng/ml) and IGF-1 (100 ng/ml) for 4 days. For induced quiescence condition, NHDFs (PDL 12) were cultured in DMEM (1 g/L glucose) supplemented with 1% FBS and doxorubicin (100 ng/ml) for 4 days. After 4 days, the NHDFs treated with doxorubicin alone or in combination with IGF-1 were incubated with 10  $\mu$ M EdU in the presence or absence of 10% FBS for 16 h. (A) Representative immunofluorescent images of NHDFs stained for EdU (proliferating cells) and 53BP1 (cells with active DNA damage response). Scale bar = 50  $\mu$ m. (B) Quantification of EdU as percentage of cells with positive nuclear staining. (C) Quantification of 53BP1-positive cells as percentage of cells with positive nuclear staining. For B and C, data are shown as mean  $\pm$  SD (n=5), \*\*\* P < 0.001 compared cells without FBS by one-way analysis of variance.

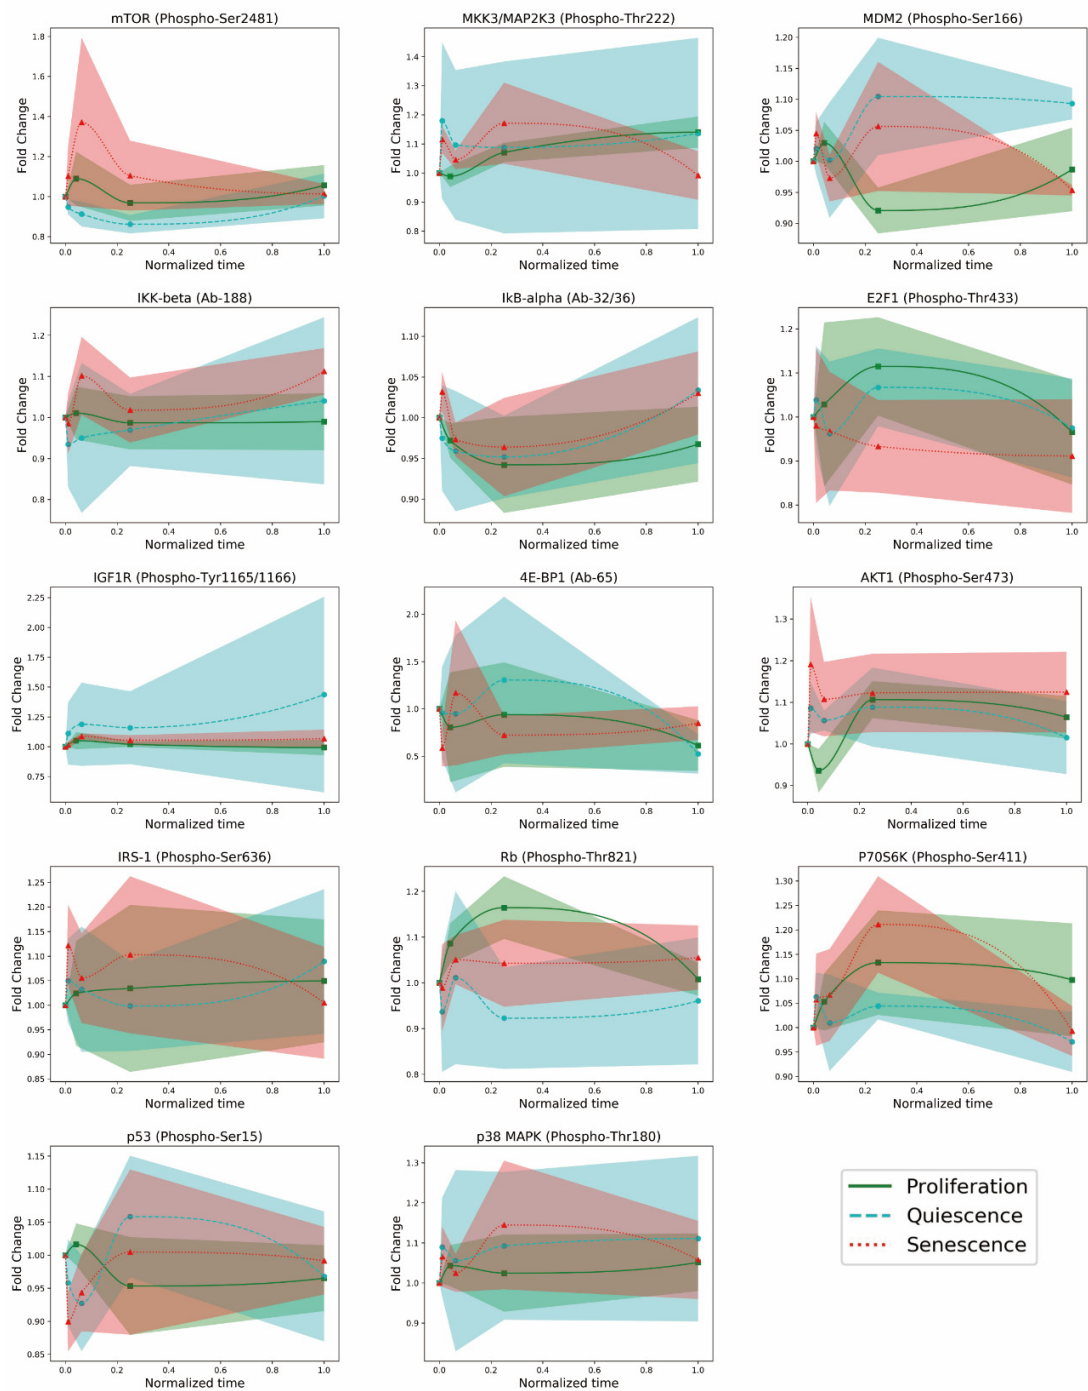

**Fig. S4. The time course measurements of 14 key proteins obtained from phosphoprotein array.** Fold changes along with normalized time under proliferation, quiescence and senescence conditions are plotted (see the Methods section). Points indicate mean fold change values. Shaded error bands show median absolute deviations (n=4).

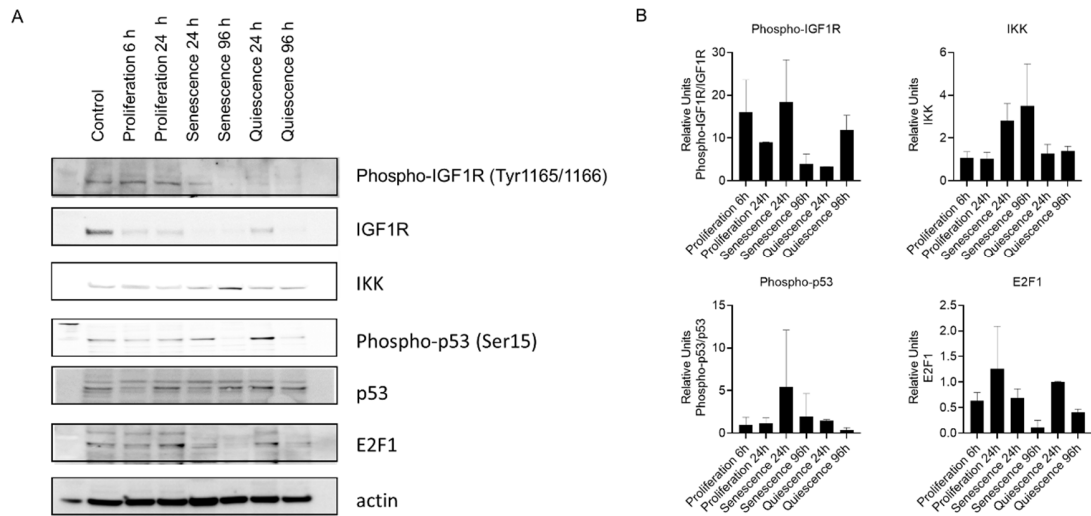

**Fig. S5. Immunoblot analysis and quantification.** (A) Immunoblot showing the abundance of the indicated proteins or phosphorylated proteins in NHDFs. For induced senescence condition, NHDFs (PDL 12) were cultured in DMEM (4.5 g/L glucose) supplemented with 10% FBS, doxorubicin (100 ng/ml) and IGF-1 (100 ng/ml) for the indicated times. For induced quiescence condition, NHDFs (PDL 12) were cultured in DMEM (1 g/L glucose) supplemented with 1% FBS and doxorubicin (100 ng/ml) for the indicated times. For proliferation, NHDFs were cultured in DMEM (4.5 g/L glucose) supplemented with 10% FBS and IGF-1 (100 ng/ml) for the indicated times. NHDFs (PDL12) grown in DMEM (1 g/L glucose) media with 1% FBS were used as control. Cell lysates were subjected to immunoblot analysis using antibodies against the indicated proteins. Data are representative of at least two independent experiments. (B) Immunoblot quantification. Data are shown as means  $\pm$  SD ( $n = 2$ ).

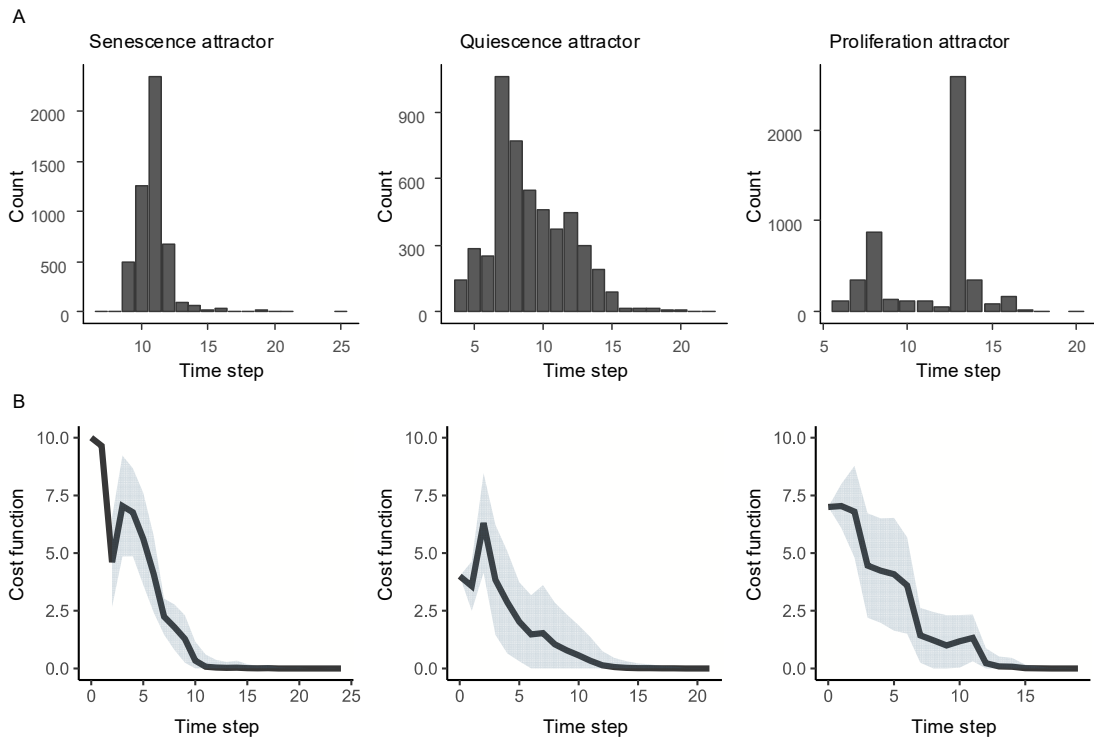

**Fig. S6. Time steps and cost function values for the Boolean models reaching the senescence, quiescence, or proliferation attractors.** (A) The bar graphs show the time steps taken for 5000 Boolean network models to reach their respective attractors. (B) The line graphs show the average value of the cost function for Boolean network models at each time step. Shaded error bands show standard deviations.

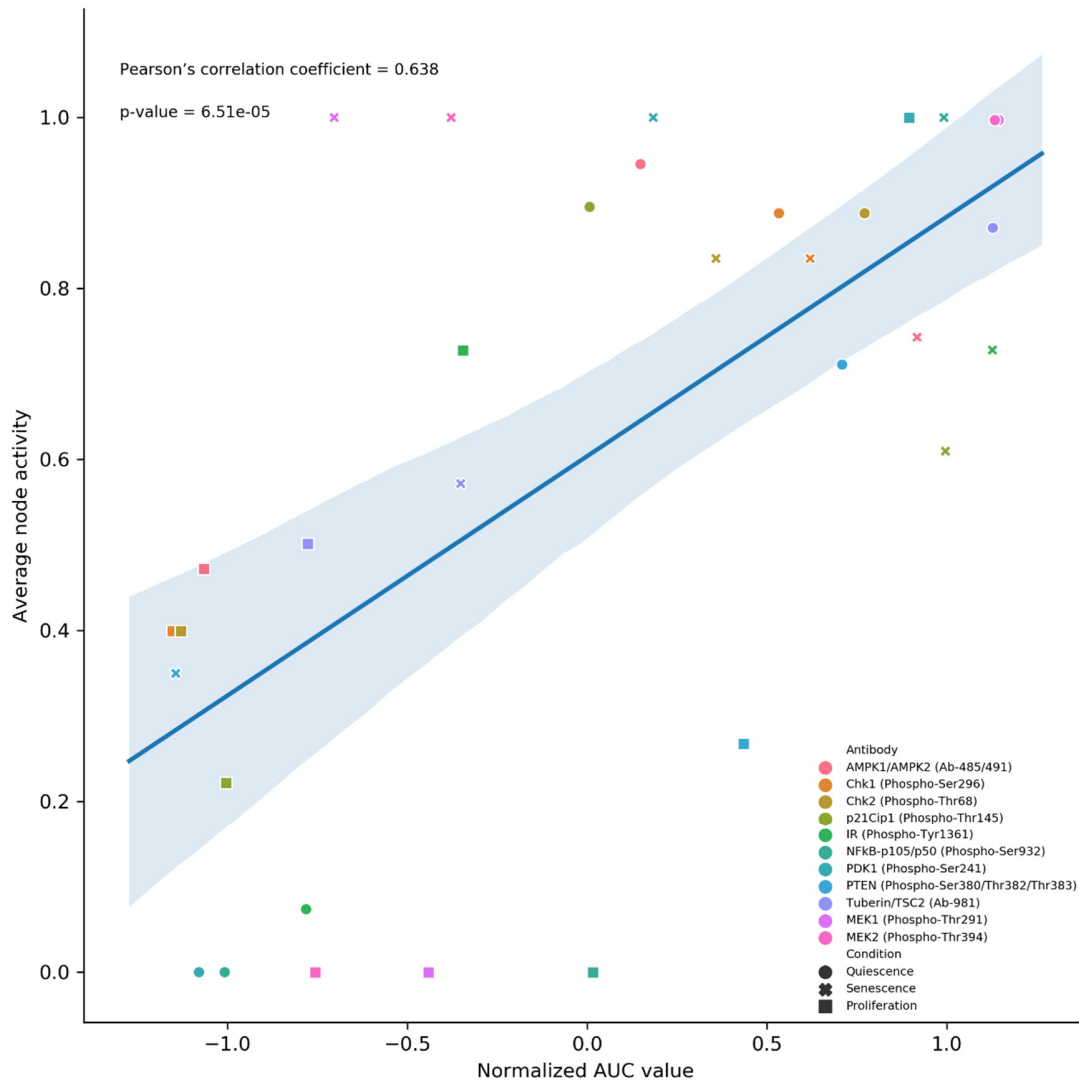

**Fig. S7. Scatter plot and regression line of normalized AUC value on average node activity.** Normalized AUC value (x-axis) is a representative value of time-series phosphoprotein array data (see Methods for details). Average node activity (y-axis) is the average value of node states (0 or 1) of 5000 Boolean network models after the models reached their respective attractors under each of conditions. See Table S6 for the corresponding node in the network model for each antibody. A blue line is the regression line and a translucent band around the line shows 95% confidence interval. The antibodies are marked with different colors. The conditions are marked with different shapes. Pearson's correlation and two-tailed p-value are shown in the upper left corner.



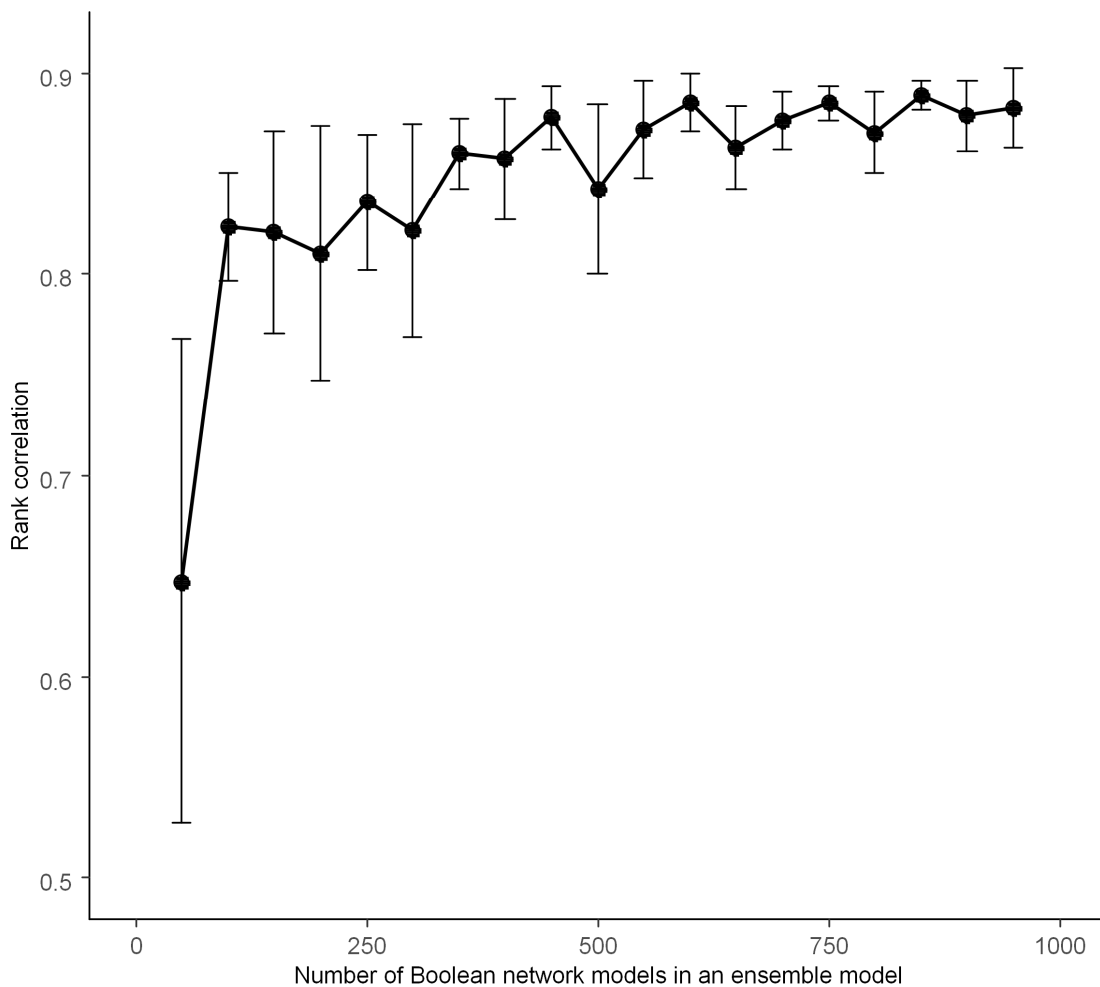

**Fig. S8. Rank correlation of identified targets for senescence reversion by the number of Boolean network models in an ensemble model.** We simulated pairs of ensemble models with a specific number of different Boolean network models to identify targets for senescence reversion, and we evaluated their Spearman rank-order correlation. The plot shows the Spearman rank-order correlation according to increasing number of Boolean network models in an ensemble model. The error bars represent standard deviations (n=10).

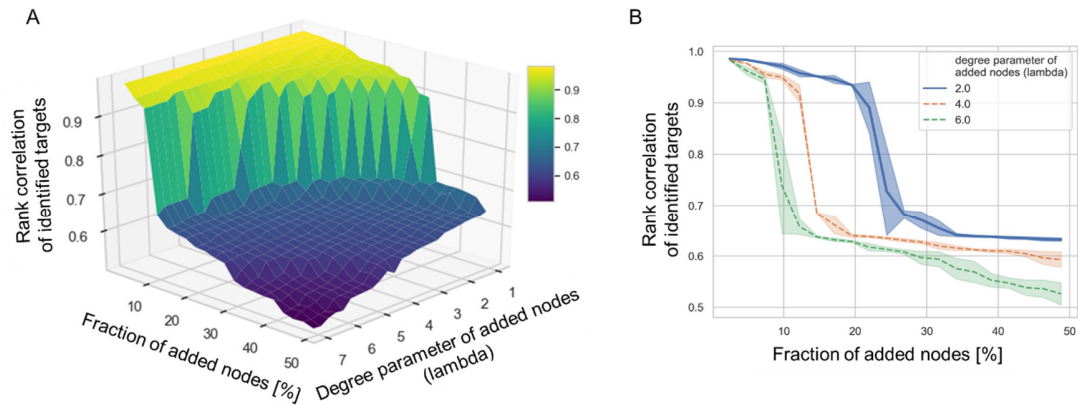

**Fig. S9. Robustness analysis of the rank correlation of identified targets for senescence reversion with respect to network perturbations.** We performed extensive simulations of the effects of senescence reversion by controlling the identified targets from perturbed networks, which are networks with randomly added nodes that represent kinases or regulators we possibly missed, and evaluated the resulting rank correlations. The added nodes were randomly connected to the nodes within the network excluding the input and output nodes. The number of connections (degree) that each of these added nodes are followed by the Poisson distribution with a specific lambda parameter. The targets of senescence reversion in rank from perturbed networks were compared to the results from the original network. For this comparison, weighted Kendall Tau rank correlation was used where rank  $r$  is mapped to weight  $1/(r+1)^2$  in order to emphasize higher ranking targets. (A) 3D plot showing the robustness analysis results of rank correlations with respect to the fraction of added nodes and degree parameter. X-axis denotes the fraction of randomly added nodes against the total number of nodes in the network, y-axis denotes a lambda parameter of the Poisson distribution, and z-axis denotes weighted Kendall Tau rank correlation results of senescence reversion. (B) Average value of weighted Kendall Tau rank correlations for different values of lambda. Shaded error bands represent standard deviations ( $n=20$ ). The solid blue line ( $\lambda=2$ ) shows the rank correlation results of senescence reversion with the degree distribution of added nodes closest to that of the original network.

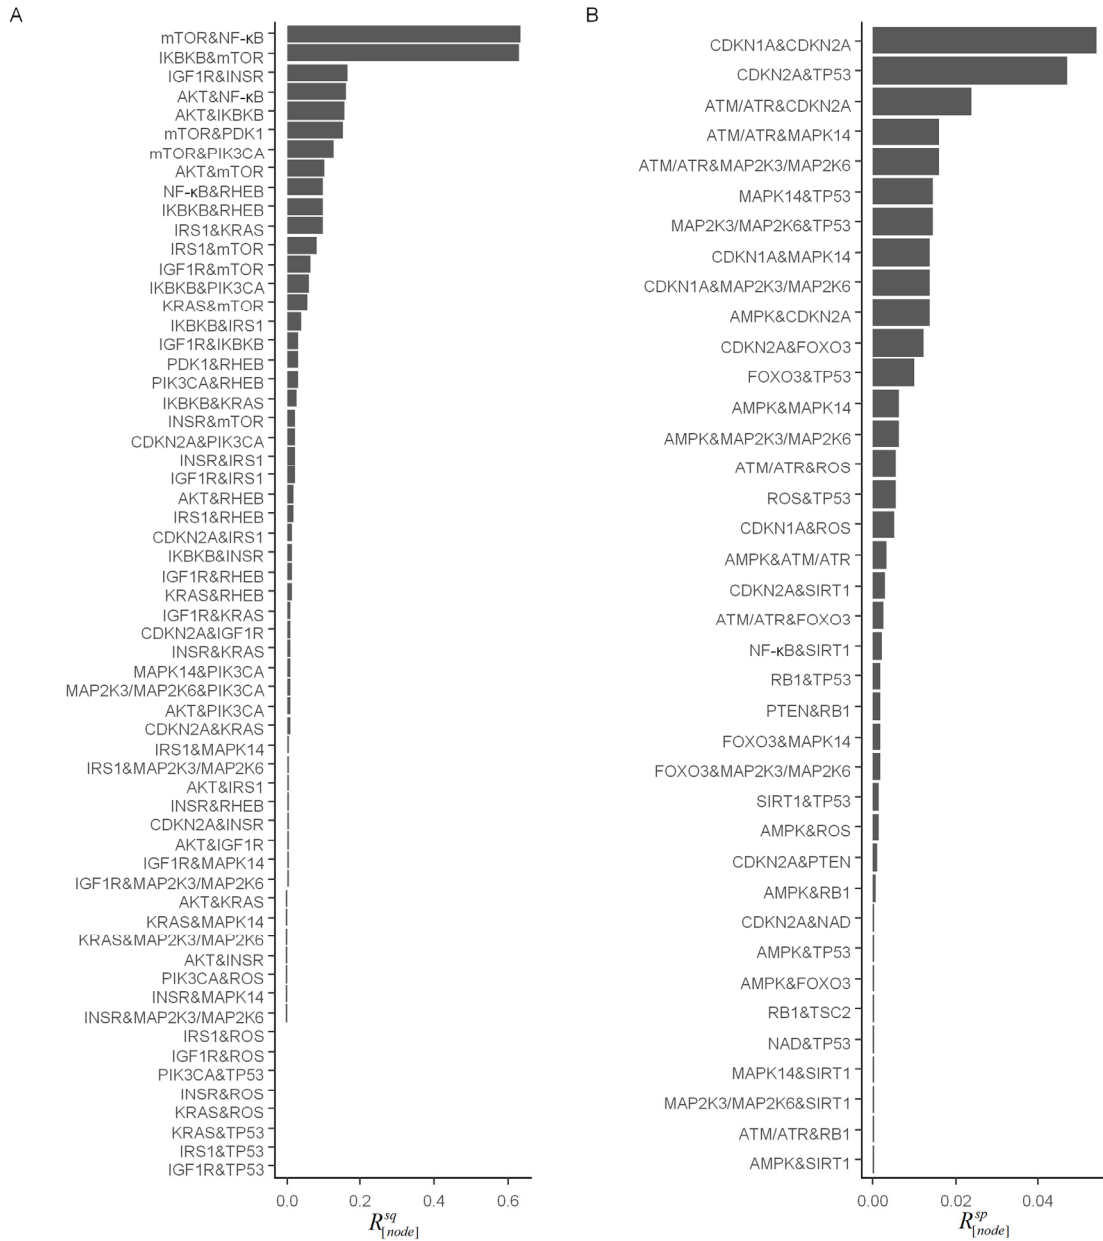

**Fig. S10. Double node inhibition simulation results.** (A) The bar graph shows the ratio of Boolean network models for which double node inhibition converts the senescence state into the quiescence state ( $R_{[node]}^{sq}$ ). (B) The bar graph shows the ratio of Boolean network models for which double node inhibition converts the senescence state into the proliferation state ( $R_{[node]}^{sp}$ ).

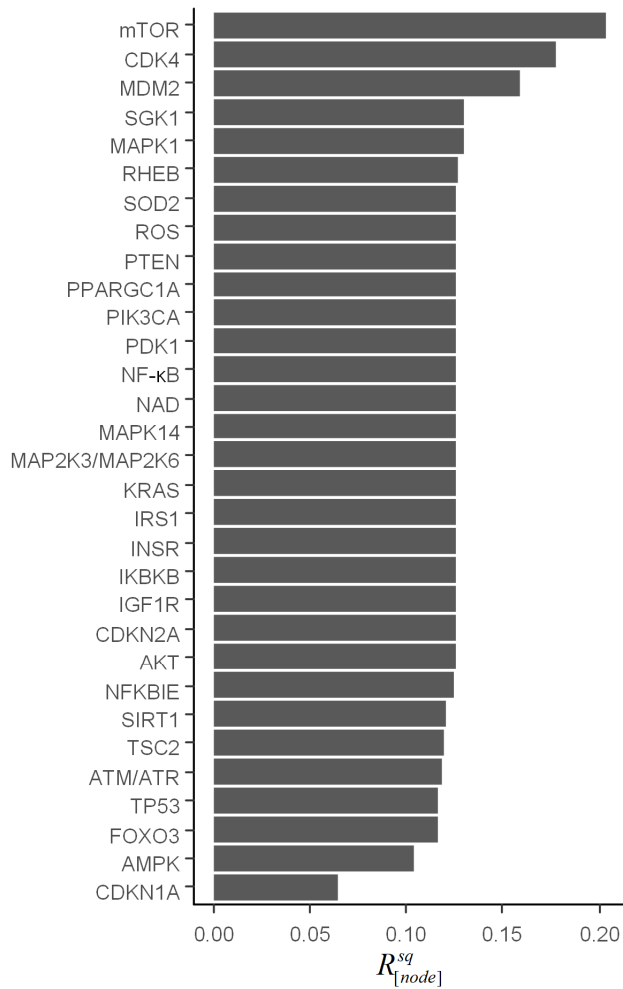

**Fig. S11. Single node inhibition simulation results using an ensemble model with simplified Boolean models.** Boolean models were simplified by converting network logical parameter values into 1, -1 or 0 according to the sign of their optimized parameter values. The bar graph shows the ratio of simplified Boolean network models for which the node inhibition converts the senescence state into the quiescence state ( $R_{[node]}^{sq}$ ). There was no node for which its inhibition converted the senescence attractor to the proliferation attractor ( $R_{[node]}^{sp}$ ) in an ensemble model with simplified Boolean models.

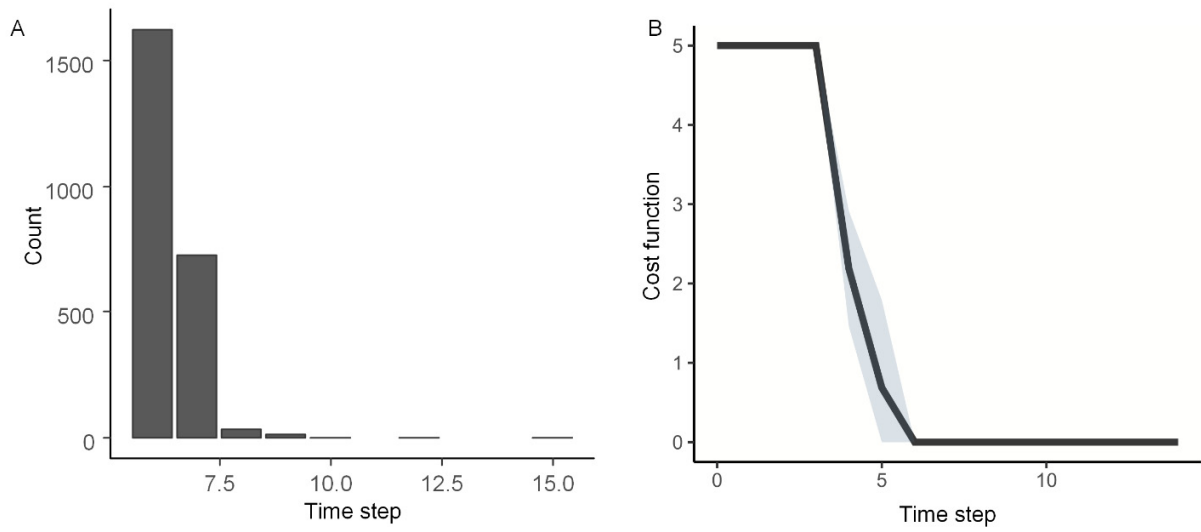

**Fig. S12. Transition from senescence attractor to quiescence attractor by PDK1 inhibition.** The 2401 Boolean network models in which PDK1 was detected as the senescence-reversing target were analyzed. (A) The bar graph shows counts of Boolean network models by time step took for Boolean network models to reach the quiescence attractor from senescence attractor by PDK1 inhibition. (B) Average value of cost function of Boolean network models at each time step. Shaded error bands show standard deviations (n=2401).

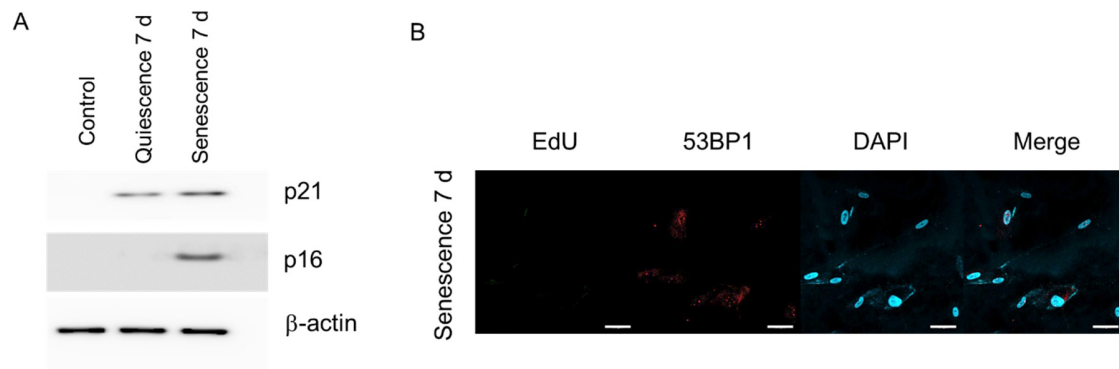

**Fig. S13. Immunoblots and immunofluorescent images of NHDFs under senescence on day 7.** For induced senescence condition, NHDFs (PDL 12) were cultured in DMEM (4.5 g/L glucose) supplemented with 10% FBS, doxorubicin (100 ng/ml) and IGF-1 (100 ng/ml) for 7 days. For induced quiescence condition, NHDFs (PDL 12) were cultured in DMEM (1 g/L glucose) supplemented with 1% FBS and doxorubicin (100 ng/ml) for 7 days. NHDFs (PDL12) grown in DMEM (4.5 g/L glucose) media with 10% FBS were used as control. (A) Representative immunoblot showing p16 and p21 expression levels. Data are representative of at least two independent experiments. (B) Representative immunofluorescent images of senescent NHDFs for 7 days stained for EdU (proliferating cells) and 53BP1 (cells with active DNA damage response). Scale bar = 50  $\mu$ m.

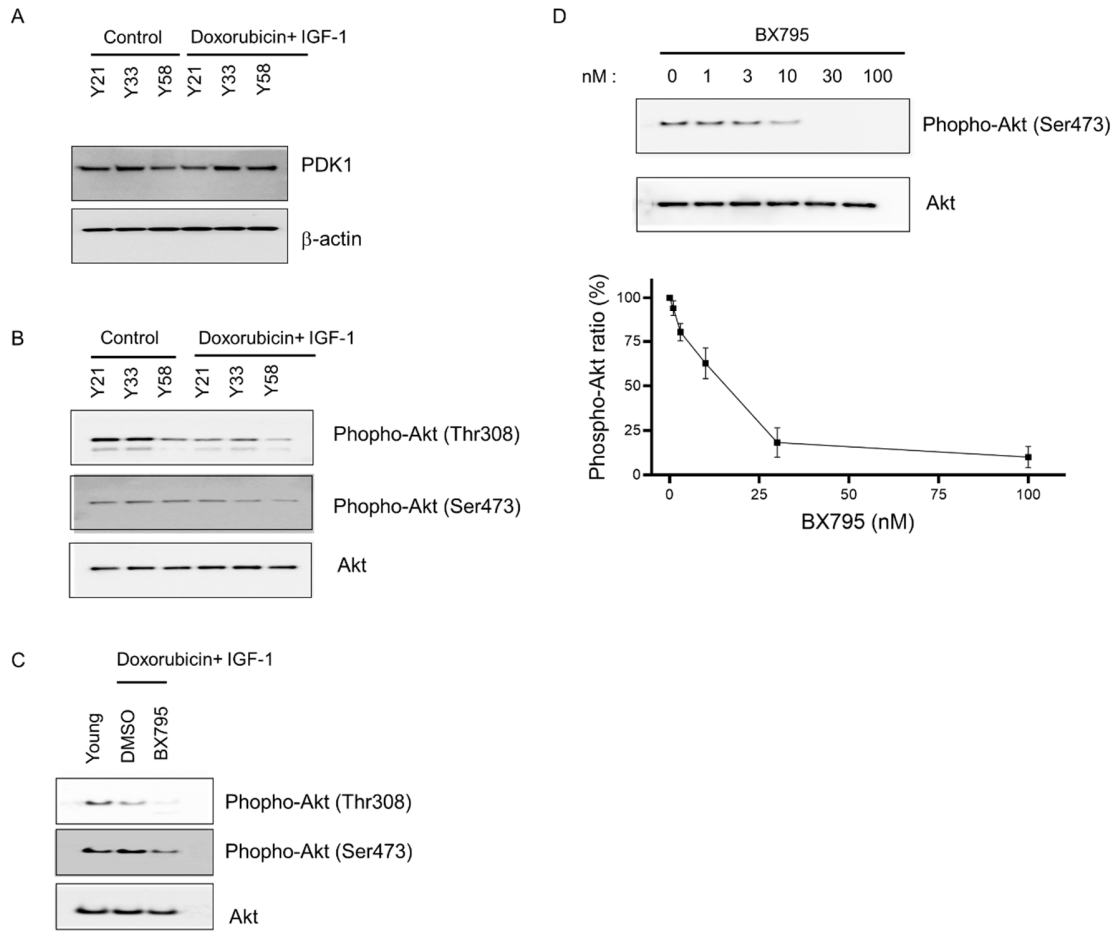

**Fig. S14. PDK1 expression level and Akt phosphorylation level in NHDFs derived from different donors (a 21-year-old, a 33-year-old, and a 58-year-old females).** For induced senescence condition, NHDFs from donors of indicated ages (PDL 12) were cultured in DMEM (4.5 g/L glucose) supplemented with 10% FBS, doxorubicin (100 ng/ml) and IGF-1 (100 ng/ml) for 7 days. Representative immunoblots showing (A) PDK1 expression levels and (B) Akt phosphorylation levels in NHDFs from the skin of female donors of different ages (21, 33, and 58) upon senescence induction. Data are representative of at least two independent experiments. (C) Akt phosphorylation levels in Y33 NHDFs upon senescence induction in the presence or absence of PDK inhibition. NHDFs were induced to senescence by treatment with doxorubicin (100 ng/ml) plus IGF-1 (100 ng/ml) for 7 days. The senescent cells were then exposed to DMSO or BX795 (100 nM) for 7 more days and analyzed its effect on phospho-Akt (Thr308), phospho-Akt (Ser473), and total Akt levels by immunoblotting. Young NHDFs were not subjected to senescence condition or drug treatment. Data are representative of at least two independent experiments. (D) BX795 inhibits phosphorylation of Akt (Ser473) in Y33 NHDFs. Y33 NHDFs were treated with vehicle or various concentration of BX795 for 30 min. The phosphorylation of Akt (Ser473) was determined by immunoblotting as described in Methods. The graph represents the percentage of phosphorylation ratio (phosphorylated/total) compared to phosphorylation ratio without the inhibitor, BX795 (mean  $\pm$  SEM, n=3).

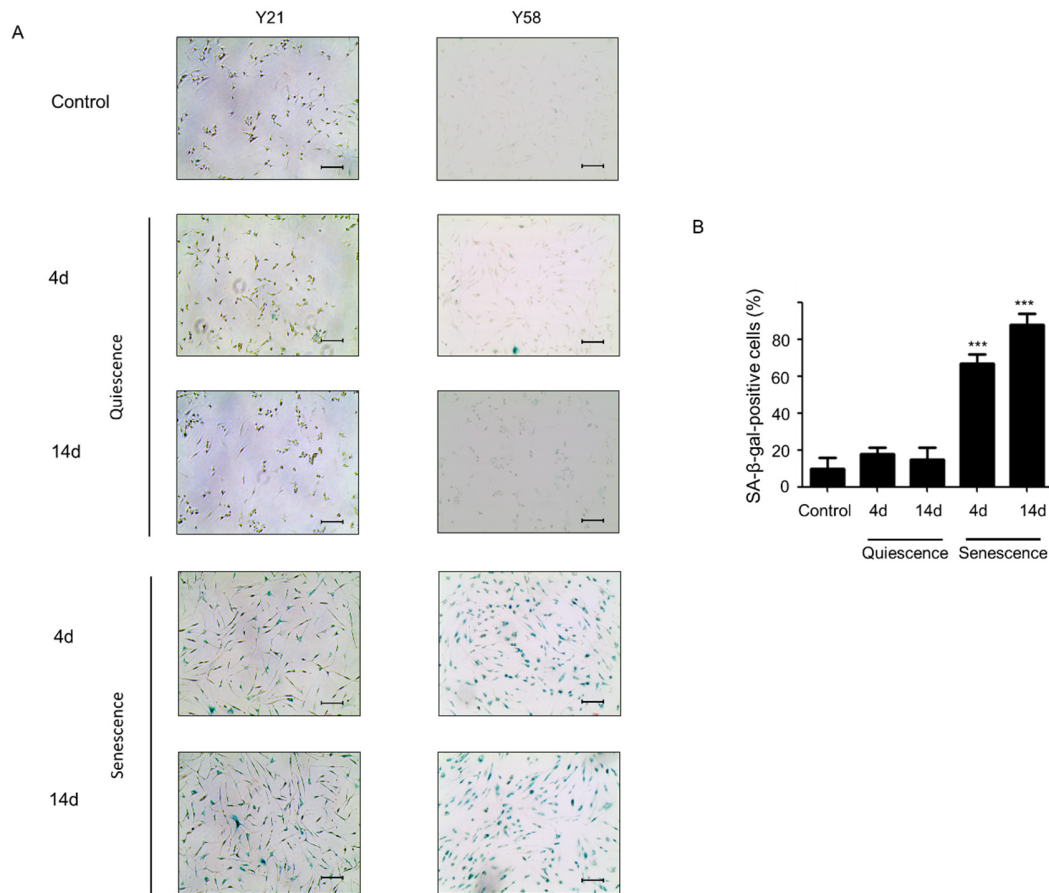

**Fig. S15. Cell morphology and SA-β-gal activity in NHDFs derived from different donors (a 21-year-old and a 58-year-old females) during induction of senescence or quiescence.** For induced senescence condition, NHDFs from donors of indicated ages (PDL 12) were cultured in DMEM (4.5 g/L glucose) supplemented with 10% FBS, doxorubicin (100 ng/ml) and IGF-1 (100 ng/ml) for the indicated time. For induced quiescent condition, NHDFs (PDL 12) were cultured in DMEM (1 g/L glucose) supplemented with 1% FBS and doxorubicin (100 ng/ml) for the indicated time. NHDFs (PDL12) grown in DMEM (4.5 g/L glucose) media with 10% FBS were used as control. (A) Representative images of SA-β-gal staining activity. Scale bar= 200μm. (B) Bar diagram showing SA-β-gal positive cells in percentage. Mean ± SD (n=5), \*\*\* P < 0.001 compared to control cells by one-way analysis of variance.



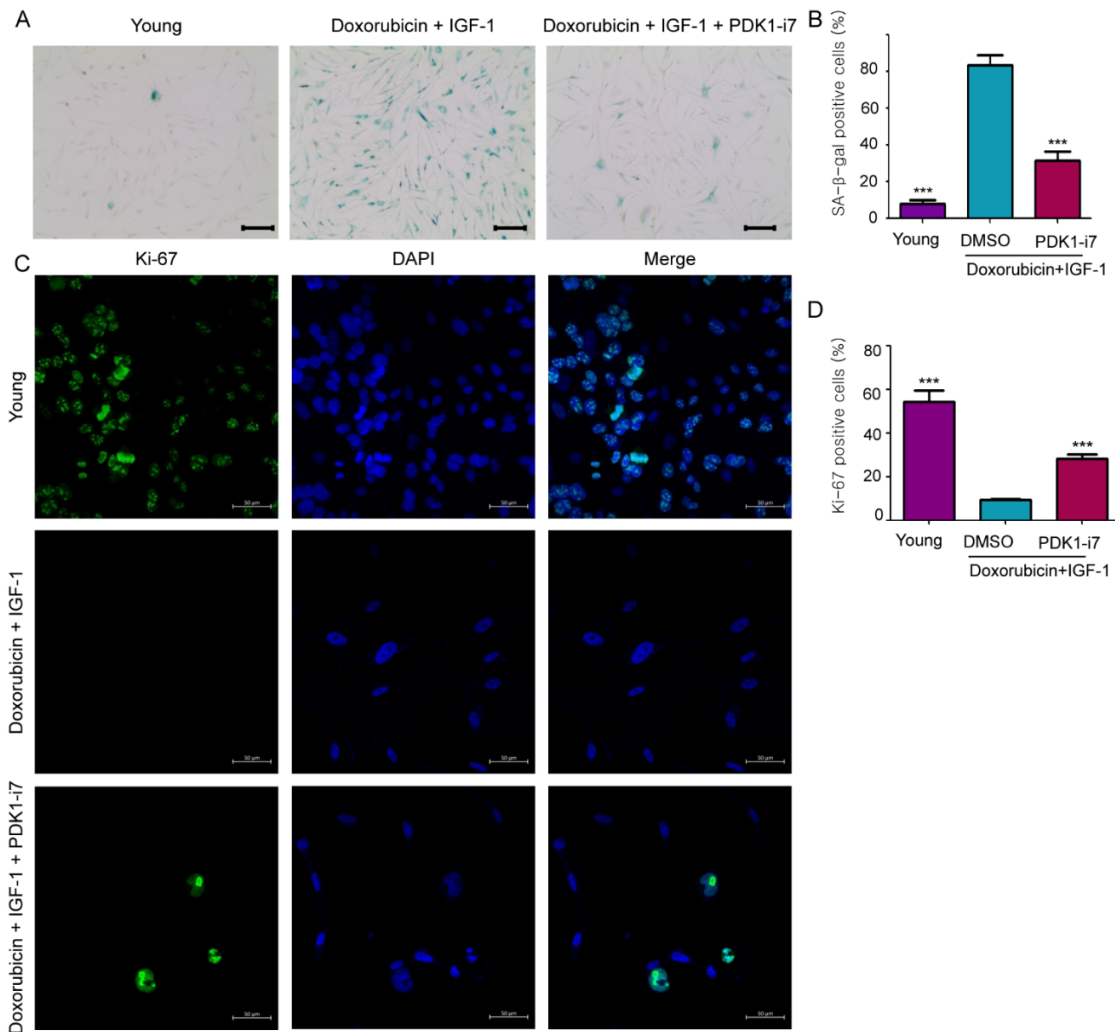

**Fig. S16. Senescence-associated phenotypes following PDK1 inhibitor 7 in NHDFs.** Young NHDFs were not subjected to senescence conditions or drug treatment. Young NHDFs were analyzed at PDL 12. NHDFs were induced to senescence by treatment with doxorubicin (100 ng/ml) plus IGF-1 (100 ng/ml) for 7 days. These cells were then treated with DMSO or PDK1-inhibitor 7 (PDK1-i7, 10 nM) for 7 more days. (A) Representative image of SA-β-gal staining. Scale bar = 200 μm. (B) Bar diagram showing percentage of SA-β-gal positive cells. (C) Representative immunofluorescent images of NHDFs stained for Ki-67. Scale bar = 50 μm. (D) Quantification of the percentages of Ki-67-positive cells. Mean ± SD (n=5), \*\*\* P < 0.001 compared to DMSO control senescent cells by one-way analysis of variance.

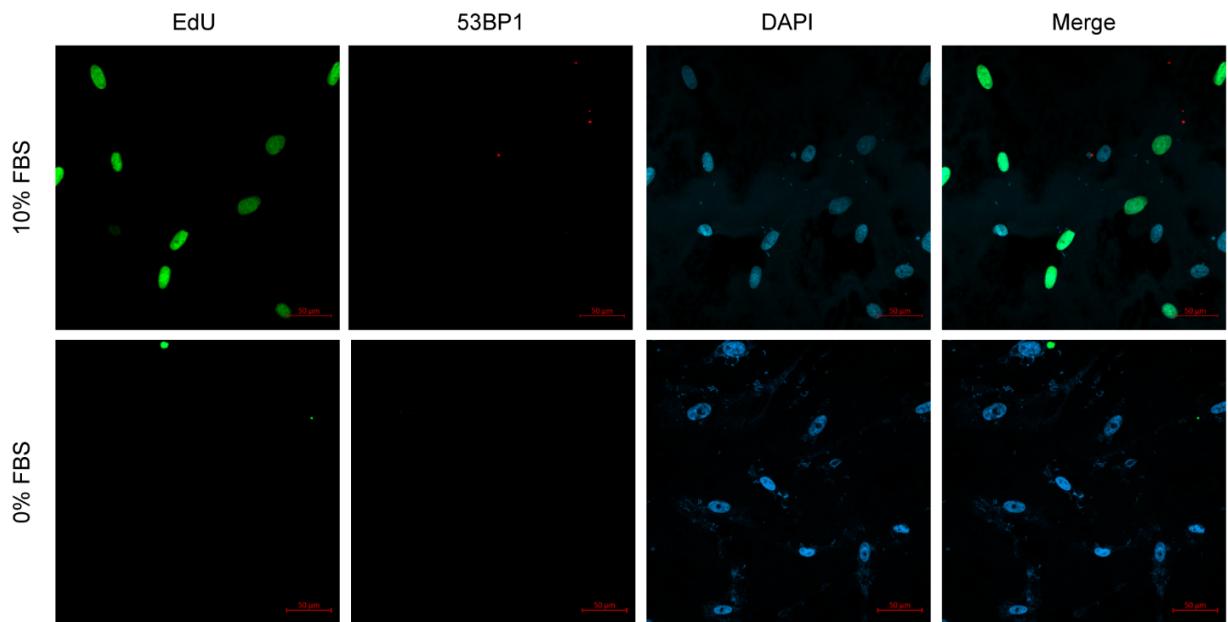

**Fig. S17. Proliferation of reverted cells.** NHDFs (PDL 12) were induced to senescence by treatment with doxorubicin (100 ng/ml) plus IGF-1 (100 ng/ml) for 7 days. The cells were then treated with BX795 (100 nM) in the presence of doxorubicin and IGF-1 for 7 more days. The BX795-treated cells were incubated with 10 μM EdU in the presence or absence of 10% FBS for 16 h. Representative immunofluorescent images of NHDFs stained for Edu, 53BP1, and DAPI. Scale bar = 50 μm.

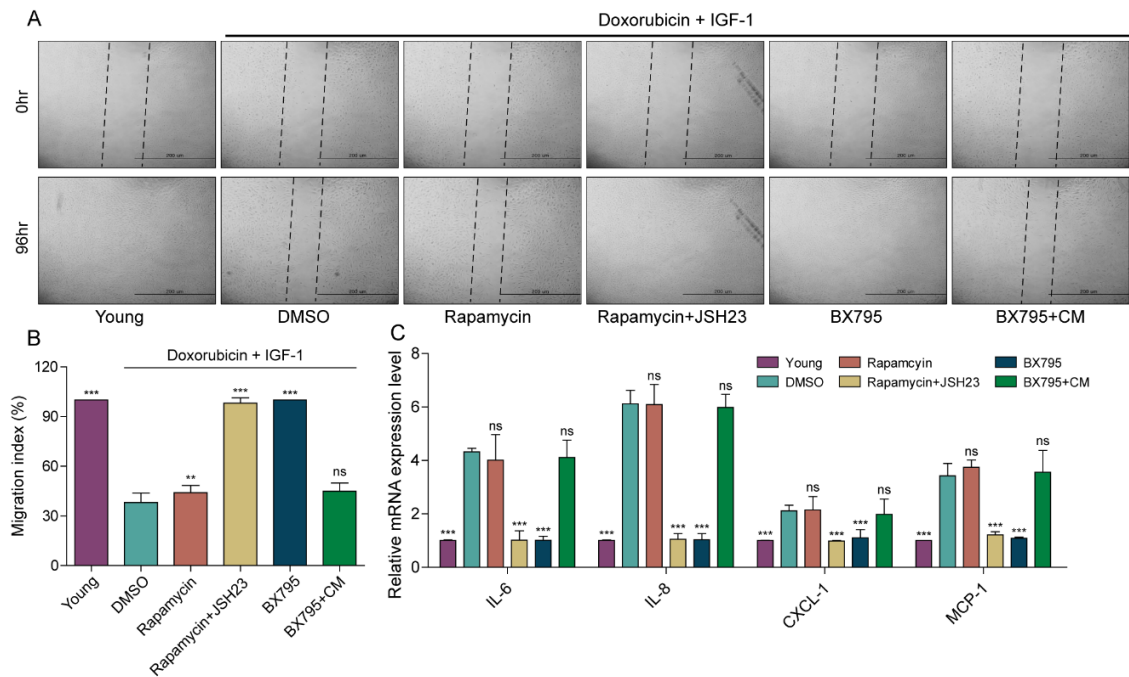

**Fig. S18. Functional recovery from senescence by PDK1 inhibition analyzed by wound-healing assay.** Young NHDFs were not subjected to senescence conditions or drug treatment. Young NHDFs were analyzed when cultures reached approximately 80% confluence at PDL 12. The remaining NHDFs were induced to senescence by 7-day exposure to doxorubicin (100 ng/ml) plus IGF-1 (100 ng/ml). For drug-treated conditions, the senescent cells were then treated with DMSO, rapamycin (100 nM), rapamycin plus JSH23 (2.5 $\mu$ M), or BX795 (100 nM) for 7 more days. For conditioned medium treatment (BX795 + CM), cells were grown in the presence of doxorubicin and IGF-1 for 7 days, followed by 7 days in the additional presence of doxorubicin, IGF-1, and BX795, were subcultured, and then were incubated with conditioned medium from senescent cells for 3 more days. (A) Representative images from 0 h and 96 h post-wounding are shown. Dashed lines mark the wound area. Scale bar = 200  $\mu$ m. (B) Quantification analysis of migration area in scratch wound assay. Mean  $\pm$  SD (n=3), \*\*\* P < 0.001 compared to DMSO control senescent cells by one-way analysis of variance. (C) mRNA expression levels of SASP genes measured with qRT-PCR analysis. Mean  $\pm$  SD (n=5), \*\* P < 0.01 or \*\*\* P < 0.001 compared to DMSO control senescent cells by one-way analysis of variance.

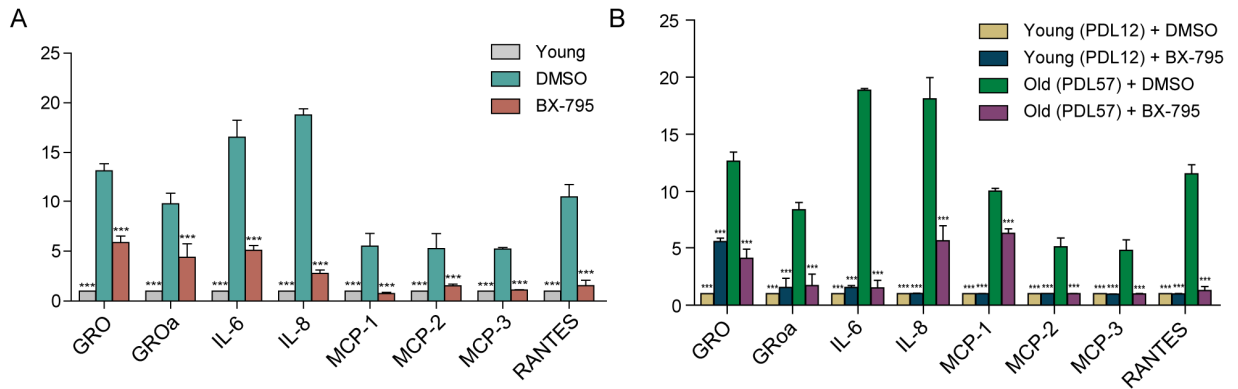

**Fig. S19. PDK1 inhibition suppresses the SASP in skin equivalents.** 3D skin models (skin equivalents) were prepared from young NHDFs (PDL 12) or senescent NHDFs induced into senescence by doxorubicin plus IGF-1 or repeated plating (replicative senescence, PDL 57) were exposed to DMSO or BX795. Conditioned medium (CM) from skin equivalents from chemical-induced or replicative senescent NHDFs treated with or without BX795 were measured with a cytokine antibody array and were normalized to internal positive controls on each membrane. (A) Secreted protein measured in a cytokine array of skin equivalents from chemical-induced NHDFs treated with or without BX795. (B) Secreted protein measured in a cytokine array of skin equivalents from replicative senescent NHDFs treated with or without BX795. Mean  $\pm$  SD (n=3), \*\*\*P < 0.001 by compared to DMSO control senescent cells by one-way analysis of variance.

**Table S1. The 41 nodes composing the cellular senescence network**

| Name           | Gene symbol            | Entrez ID        | Uniprot ID             |
|----------------|------------------------|------------------|------------------------|
| AKT            | AKT1                   | 207              | P31749                 |
| AMPK           | PRKAA1, PRKAA2, PRKAB1 | 5562, 5563,5564  | Q13131, P54646,Q9Y478  |
| ATM/ATR        | ATM, ATR               | 472, 545         | Q13315, Q13535         |
| CDK4           | CDK2, CDK4, CDK6       | 1017, 1019, 1021 | P24941, P11802, Q00534 |
| CDKN1A         | CDKN1A                 | 1026             | P38936                 |
| CDKN2A         | CDKN2A                 | 1029             | Q8N726                 |
| DNA damage     | -                      | -                | -                      |
| E2F1           | E2F1                   | 1869             | Q01094                 |
| 4E-BP1         | EIF4EBP1               | 1978             | Q13541                 |
| FOXO3          | FOXO3                  | 2309             | O43524                 |
| IGF-1          | IGF1                   | 3479             | P05019                 |
| IGF1R          | IGF1R                  | 3480             | P08069                 |
| IKBKB          | IKBKB                  | 3551             | O14920                 |
| IL-8           | CXCL8                  | 3576             | P10145                 |
| IL-6           | IL6                    | 3569             | P05231                 |
| INSR           | INSR                   | 3643             | P06213                 |
| IRS1           | IRS1                   | 3667             | P35568                 |
| KRAS           | KRAS, HRAS             | 3845, 3265       | P01116, P01112         |
| MAP2K3/MAP2K6  | MAP2K3, MAP2K6         | 5606, 5608       | P46734, P52564         |
| MAPK1          | MAPK1                  | 5594             | P28482                 |
| MAPK14         | MAPK14                 | 1432             | Q16539                 |
| MDM2           | MDM2                   | 4193             | Q00987                 |
| mTOR           | MTOR                   | 2475             | P42345                 |
| NAD            | -                      | -                | -                      |
| NF- $\kappa$ B | NFKB1                  | 4790             | P19838                 |
| NFKBIE         | NFKBIA, NFKBIE         | 4792, 4794       | P25963, O00221         |
| PDK1           | PDPK1                  | 5170             | O15530                 |
| PIK3CA         | PIK3CA                 | 5290             | P42336                 |
| PPARGC1A       | PPARGC1A               | 10891            | Q9UBK2                 |
| PTEN           | PTEN                   | 5728             | P60484                 |
| RB1            | RB1                    | 5925             | P06400                 |
| RHEB           | RHEB                   | 6009             | Q15382                 |
| ROS            | -                      | -                | -                      |
| S6K1           | RPS6KB1                | 6198             | P23443                 |
| SGK1           | SGK1                   | 6446             | O00141                 |
| SIRT1          | SIRT1                  | 23411            | Q96EB6                 |
| SOD2           | SOD2                   | 6648             | P04179                 |
| TP53           | TP53                   | 7157             | P04637                 |
| TSC2           | TSC2                   | 7249             | P49815                 |
| ULK1           | ULK1                   | 8408             | O75385                 |
| Low nutrition  | -                      | -                | -                      |

**Table S2. The 77 links composing the cellular senescence network**

| Source node   | Regulation type | Target node   | Mechanism          | PMID     | Database             |
|---------------|-----------------|---------------|--------------------|----------|----------------------|
| AKT           | -               | CDKN1A        | phosphorylation    | 11463845 | Omnitpah;STRING      |
| AKT           | -               | FOXO3         | phosphorylation    | 12517744 | Omnitpah;STRING      |
| AKT           | +               | IKBKB         | phosphorylation    | 11259436 | Omnitpah;STRING      |
| AKT           | +               | MDM2          | phosphorylation    | 11923280 | Omnitpah;STRING      |
| AKT           | +               | mTOR          | phosphorylation    | 16027121 | Omnitpah;STRING      |
| AKT           | -               | PTEN          | ubiquitination     | 26183061 | Omnitpah;STRING      |
| AKT           | -               | TSC2          | phosphorylation    | 12172553 | Omnitpah;STRING      |
| AMPK          | +               | FOXO3         | phosphorylation    | 22186033 | Omnitpah;STRING      |
| AMPK          | -               | mTOR          | phosphorylation    | 22186033 | Omnitpah;STRING      |
| AMPK          | +               | NAD           | metabolism         | 19262508 | KEGG;STRING          |
| AMPK          | +               | PPARGC1A      | transcription      | 23963743 | Omnitpah;STRING      |
| AMPK          | +               | TP53          | phosphorylation    | 22186033 | Omnitpah;STRING      |
| AMPK          | +               | TSC2          | phosphorylation    | 22186033 | Omnitpah;STRING      |
| AMPK          | +               | ULK1          | phosphorylation    | 22186033 | Omnitpah;STRING      |
| ATM/ATR       | +               | TP53          | phosphorylation    | 9925639  | KEGG;Omnipath;STRING |
| CDK4          | -               | RB1           | phosphorylation    | 24089445 | KEGG;Omnipath;STRING |
| CDKN1A        | -               | CDK4          | binding            | 24089445 | KEGG;Omnipath;STRING |
| CDKN2A        | -               | CDK4          | binding            | 24089445 | KEGG;Omnipath;STRING |
| CDKN2A        | -               | MDM2          | binding            | 9724636  | KEGG;Omnipath;STRING |
| DNA damage    | +               | ATM/ATR       | input              |          |                      |
| DNA damage    | +               | MAP2K3/MAP2K6 | input              |          |                      |
| DNA damage    | +               | ROS           | input              |          |                      |
| FOXO3         | +               | ATM/ATR       | phosphorylation    | 22893124 | Omnitpah;STRING      |
| FOXO3         | +               | CDKN1A        | transcription      | 28808415 | KEGG;STRING          |
| FOXO3         | +               | SOD2          | transcription      | 26184557 | KEGG;STRING          |
| IGF-1         | +               | IGF1R         | input              |          |                      |
| IGF1R         | +               | IRS1          | phosphorylation    | 26474286 | KEGG;Omnipath;STRING |
| IGF1R         | +               | KRAS          | Indirect           | 23658296 | STRING               |
| IKBKB         | -               | IRS1          | phosphorylation    | 22982470 | KEGG;Omnipath;STRING |
| IKBKB         | -               | NFKBIE        | phosphorylation    | 10602459 | Omnitpah;STRING      |
| IKBKB         | -               | PTEN          | transcription      | 14729949 | STRING               |
| INSR          | +               | IRS1          | binding            | 20966354 | KEGG;Omnipath;STRING |
| INSR          | +               | KRAS          | GTP-GDP conversion | 20966354 | Omnitpah;STRING      |
| IRS1          | +               | PIK3CA        | binding            | 20966354 | KEGG;Omnipath;STRING |
| KRAS          | +               | MAPK1         | phosphorylation    | 11942415 | KEGG;STRING          |
| KRAS          | +               | PIK3CA        | binding            | 21779497 | KEGG;Omnipath;STRING |
| Low nutrition | +               | AMPK          | input              |          |                      |
| Low nutrition | -               | INSR          | input              |          |                      |
| MAP2K3/MAP2K6 | +               | MAPK14        | phosphorylation    | 11942415 | KEGG;Omnipath;STRING |
| MAPK1         | -               | FOXO3         | phosphorylation    | 18204439 | Omnitpah;STRING      |
| MAPK14        | +               | CDKN2A        | transcription      | 19619499 | KEGG;STRING          |
| MAPK14        | +               | FOXO3         | phosphorylation    | 22128155 | Omnitpah;STRING      |
| MAPK14        | +               | TP53          | phosphorylation    | 17481747 | KEGG;Omnipath;STRING |
| MDM2          | -               | FOXO3         | ubiquitination     | 21238503 | Omnitpah;STRING      |
| MDM2          | -               | RB1           | ubiquitination     | 15577944 | KEGG;Omnipath;STRING |
| MDM2          | -               | TP53          | ubiquitination     | 23885265 | KEGG;Omnipath;STRING |
| mTOR          | -               | 4E-BP1        | phosphorylation    | 12080086 | KEGG;Omnipath;STRING |
| mTOR          | +               | PPARGC1A      | transcription      | 18046414 | STRING               |
| mTOR          | +               | S6K1          | phosphorylation    | 12080086 | KEGG;Omnipath;STRING |
| mTOR          | -               | ULK1          | phosphorylation    | 21258367 | KEGG;Omnipath;STRING |
| NAD           | +               | SIRT1         | chemical reaction  | 22106091 | KEGG                 |
| NF-kB         | +               | IL-8          | transcription      | 22182507 | KEGG;STRING          |
| NF-kB         | +               | IL-6          | transcription      | 22182507 | KEGG;STRING          |
| NF-kB         | +               | MAPK1         | indirect           | 16644866 | STRING               |
| NFKBIE        | -               | NF-kB         | binding            | 10602459 | Omnitpah;STRING      |
| PDK1          | +               | AKT           | phosphorylation    | 25295225 | Omnitpah;STRING      |
| PDK1          | +               | IKBKB         | indirect           | 15802604 |                      |
| PDK1          | +               | SGK1          | phosphorylation    | 28236975 | KEGG;Omnipath;STRING |
| PIK3CA        | +               | PDK1          | binding            | 25295225 | KEGG;STRING          |
| PTEN          | -               | PDK1          | indirect           | 25295225 | KEGG;STRING          |

|       |   |               |                   |          |                      |
|-------|---|---------------|-------------------|----------|----------------------|
| RB1   | - | E2F1          | transcription     | 24089445 | KEGG;Omnipath;STRING |
| RHEB  | + | mTOR          | binding           | 15854902 | KEGG;Omnipath;STRING |
| ROS   | + | MAP2K3/MAP2K6 | indirect          | 20112989 |                      |
| SGK1  | - | FOXO3         | phosphorylation   | 11154281 | Omnipath;STRING      |
| SIRT1 | + | FOXO3         | deacetylation     | 14976264 | KEGG;Omnipath;STRING |
| SIRT1 | - | NF-kB         | deacetylation     | 23029496 | KEGG;STRING          |
| SIRT1 | + | PPARGC1A      | deacetylation     | 21396404 | KEGG;Omnipath;STRING |
| SIRT1 | - | TP53          | deacetylation     | 12220851 | KEGG;Omnipath;STRING |
| SIRT1 | + | TSC2          | deacetylation     | 20169165 | STRING               |
| SOD2  | - | ROS           | chemical reaction | 22302046 | KEGG                 |
| TP53  | + | CDKN1A        | transcription     | 24089445 | KEGG;Omnipath;STRING |
| TP53  | - | IGF1R         | indirect          | 29273484 | STRING               |
| TP53  | + | MDM2          | transcription     | 14707283 | KEGG;Omnipath;STRING |
| TP53  | + | PTEN          | transcription     | 11545734 | KEGG;Omnipath;STRING |
| TSC2  | - | RHEB          | binding           | 12842888 | KEGG;Omnipath;STRING |
| E2F1  | - | IKBKB         | binding           | 27185527 |                      |
| TP53  | + | AMPK          | indirect          | 27454290 | STRING               |

**Table S3. Experimental conditions of phosphoprotein array**

|                 |         | Quiescence       | Senescence       | Proliferation |
|-----------------|---------|------------------|------------------|---------------|
| Media condition | IGF-1   | -                | 100ng/ml         | 100ng/ml      |
|                 | FBS     | 1%               | 10%              | 10%           |
|                 | Glucose | 1g/ml            | 4.5g/ml          | 4.5g/ml       |
| Doxorubicin     |         | 100ng/ml         | 100ng/ml         | -             |
| Time points     |         | 1h, 6h, 24h, 96h | 1h, 6h, 24h, 96h | 1h, 6h, 24h   |



**Table S4. Summary of the phosphoprotein array data and supporting literatures for binarized AUC values of the 14 key proteins.** From RPPA experiments (n=4), mean fold changes of 14 key proteins at each time point were used to calculate AUC values. These AUC values were z-score normalized and then binarized based on threshold values (see Threshold value column) inferred from previous studies (see PMID column). 11 out of 14 AUC values of key proteins were well in accord with the previous experimental observations reported in the literature. The AUC value of IGF1R under quiescence condition did not match the reports in the literature. However, our western blot results on IGF1R in Fig. S4. show that IGF1R level is lowest in quiescence condition, consistent with the previous findings. Given that IGF1R is a direct downstream target of IGF1, which is an input condition for both senescence and proliferation condition, we have concluded that the western blot results reflected IGF1R level better than the RPPA results. The AUC value of MDM2 under proliferation condition also did not match the reports in the literature. However, MDM2 is known to form a negative feedback loop with p53 (1, 2) which is inactivated under proliferation condition in both phosphoprotein array and western blot results in Fig. S4. Given ample citations on p53-MDM2 interaction, p53 phosphoprotein array and western blot results, we have decided the binarized AUC value of MDM2 under proliferation to 1, since the binarized AUC value of p53 under proliferation is 0. Lastly, the AUC value of NFKBIA under senescence condition did not match the reports in the literature. However, NFKBIA is directly inhibited by IKBKB (3) which is noticeably activated under senescence condition in both phosphoprotein array and western blot results in Fig. S4. Considering ample citations and our experimental results, we have decided the binarized AUC value of NFKBIA under senescence to 0, since the binarized AUC value of IKBKB under senescence is 1. We marked these three amended values in blue.

| Gene symbol | Antibody                     | AUC  |      |       | Normalized AUC |       |       | Binarized AUC |   |   | Threshold value | PMID                 |
|-------------|------------------------------|------|------|-------|----------------|-------|-------|---------------|---|---|-----------------|----------------------|
|             |                              | Q    | S    | P     | Q              | S     | P     | Q             | S | P |                 |                      |
| EIF4EBP1    | 4E-BP1 (Ab-65)               | 1.10 | 0.80 | 0.86  | 1.39           | -0.93 | -0.45 | 1             | 0 | 0 | 0               | 21750861<br>30602778 |
| AKT1        | AKT1 (Phospho-Ser473)        | 1.07 | 1.12 | 1.075 | -0.80          | 1.41  | -0.61 | 0             | 1 | 1 | -0.7            | 22481935<br>21909130 |
| E2F1        | E2F1 (Phospho-Thr433)        | 1.04 | 0.93 | 1.08  | 0.37           | -1.37 | 1.00  | 0             | 0 | 1 | 0.5             | 11719808<br>16596252 |
| IGF1R       | IGF1R (Phospho-Tyr1165/1166) | 1.23 | 1.06 | 1.01  | 1.38           | -0.43 | -0.95 | 0             | 1 | 1 | -               | 28945762<br>28966916 |
| NFKBIA      | IkB-alpha (Ab-32/36)         | 0.97 | 0.98 | 0.95  | 0.33           | 1.02  | -1.36 | 1             | 0 | 1 | -               | 9738011<br>21979375  |
| IKBKB       | IKK-beta (Ab-188)            | 0.99 | 1.04 | 0.99  | -0.65          | 1.41  | -0.77 | 0             | 1 | 0 | 0               | 29292732<br>26946493 |
| IRS1        | IRS-1 (Phospho-Ser636)       | 1.02 | 1.08 | 1.04  | -1.07          | 1.34  | -0.27 | 0             | 1 | 1 | -0.5            | 23478262<br>26474286 |
| MAP2K3      | MKK3/MAP2K3 (Phospho-Thr222) | 1.10 | 1.12 | 1.09  | -0.24          | 1.33  | -1.09 | 1             | 1 | 0 | -0.5            | 22404972<br>26573462 |
| MTOR        | mTOR (Phospho-Ser2481)       | 0.90 | 1.09 | 1.00  | -1.25          | 1.19  | 0.06  | 0             | 1 | 1 | 0               | 19117990<br>31316753 |
| MAPK14      | p38 MAPK (Phospho-Thr180)    | 1.10 | 1.11 | 1.03  | 0.49           | 0.90  | -1.39 | 1             | 1 | 0 | 0               | 22404972<br>26573462 |
| TP53        | p53 (Phospho-Ser15)          | 1.02 | 0.99 | 0.96  | 1.23           | -0.01 | -1.22 | 1             | 1 | 0 | -0.5            | 9681831<br>23416979  |
| RPS6KB1     | P70S6K (Phospho-Ser411)      | 1.03 | 1.15 | 1.12  | -1.37          | 0.99  | 0.38  | 0             | 1 | 1 | 0               | 25379019<br>10942600 |
| RB1         | Rb (Phospho-Thr821)          | 0.94 | 1.04 | 1.12  | -1.27          | 0.10  | 1.17  | 0             | 0 | 1 | 0.5             | 26160835<br>29577907 |
| MDM2        | MDM2 (Phospho-Ser166)        | 1.09 | 1.03 | 0.95  | 1.17           | 0.10  | -1.27 | 0             | 0 | 1 | -               | 9681831<br>29402901  |

**Table S5. Average node activities for each attractor**

| Condition<br>Node | Senescence | Quiescence | Proliferation | Senescence<br>+ PDK1<br>Inhibition |
|-------------------|------------|------------|---------------|------------------------------------|
| AKT               | 1          | 0          | 1             | 0                                  |
| AMPK              | 0.743024   | 0.945439   | 0.472303      | 0.743024                           |
| ATM/ATR           | 0.835069   | 0.887963   | 0.399417      | 0.876302                           |
| CDK4              | 0.078717   | 0.046647   | 0.593503      | 0.047897                           |
| CDKN1A            | 0.609746   | 0.89546    | 0.221991      | 0.884215                           |
| CDKN2A            | 1          | 0.996876   | 0             | 0.997918                           |
| DNA damage        | 1          | 1          | 0             | 1                                  |
| E2F1              | 0          | 0          | 1             | 0                                  |
| 4E-BP1            | 0          | 1          | 0             | 1                                  |
| FOXO3             | 0.429404   | 0.796127   | 0.091628      | 0.723449                           |
| IGF-1             | 1          | 0          | 1             | 1                                  |
| IGF1R             | 1          | 0          | 1             | 1                                  |
| IKBKB             | 1          | 0          | 0             | 0                                  |
| IL-8              | 1          | 0          | 0             | 0                                  |
| IL-6              | 1          | 0          | 0             | 0                                  |
| INSR              | 0.72803    | 0.073303   | 0.72803       | 0.72803                            |
| IRS1              | 1          | 0          | 1             | 1                                  |
| KRAS              | 0.898376   | 0.349021   | 0.898376      | 0.898376                           |
| MAP2K3/MAP2K6     | 1          | 0.996876   | 0             | 0.997918                           |
| MAPK1             | 0.913369   | 0.60808    | 0.740941      | 0.740941                           |
| MAPK14            | 1          | 0.996876   | 0             | 0.997918                           |
| MDM2              | 0          | 0          | 1             | 0                                  |
| mTOR              | 1          | 0          | 1             | 0                                  |
| NAD               | 0.671387   | 0.729696   | 0.607247      | 0.671387                           |
| NF-κB             | 1          | 0          | 0             | 0                                  |
| NFKBIE            | 0          | 1          | 1             | 1                                  |
| PDK1              | 1          | 0          | 1             | 0                                  |
| PIK3CA            | 0.999584   | 0.001249   | 0.999584      | 0.999584                           |
| PPARGC1A          | 0.931695   | 0.853811   | 0.905873      | 0.806747                           |
| PTEN              | 0.349854   | 0.710954   | 0.267389      | 0.710954                           |
| RB1               | 1          | 1          | 0             | 1                                  |
| RHEB              | 0.322366   | 0.216576   | 0.342774      | 0.224073                           |
| ROS               | 0.612661   | 0.588297   | 0.232403      | 0.593919                           |
| S6K1              | 1          | 0          | 1             | 0                                  |
| SGK1              | 0.76718    | 0.492711   | 0.76718       | 0.492711                           |
| SIRT1             | 0.618492   | 0.640983   | 0.613078      | 0.618492                           |
| SOD2              | 0.622657   | 0.722407   | 0.542274      | 0.70304                            |
| TP53              | 1          | 1          | 0             | 1                                  |
| TSC2              | 0.571845   | 0.870887   | 0.501458      | 0.830487                           |
| ULK1              | 0          | 1          | 0             | 1                                  |
| Low nutrition     | 0          | 1          | 0             | 0                                  |

**Table S6. Correlations between normalized AUC values and average node activities.**

Normalized AUC value is a representative value of time-series phosphoprotein array data (see Methods for details). Average node activity is the average value of node states (0 or 1) of 5000 Boolean network models after the models reached their respective attractors under each of conditions. Pearson's correlation coefficient for three condition pairs of normalized AUC and average node activity for each of the antibodies is shown.

| Gene symbol | Antibody                            | Normalized AUC value |       |       | Corresponding node | Average node activity |      |      | Pearson's correlation coefficient |
|-------------|-------------------------------------|----------------------|-------|-------|--------------------|-----------------------|------|------|-----------------------------------|
|             |                                     | Q                    | S     | P     |                    | Q                     | S    | P    |                                   |
| PRKAA1      | AMPK1/AMPK2 (Ab-485/491)            | 0.15                 | 0.92  | -1.07 | AMPK               | 0.95                  | 0.74 | 0.47 | 0.67                              |
| CHEK1       | Chk1 (Phospho-Ser296)               | 0.53                 | 0.62  | -1.15 | ATM/ATR            | 0.89                  | 0.84 | 0.40 | 0.99                              |
| CHEK2       | Chk2 (Phospho-Thr68)                | 0.77                 | 0.36  | -1.13 | ATM/ATR            | 0.89                  | 0.84 | 0.40 | 0.99                              |
| CDKN1A      | p21Cip1 (Phospho-Thr145)            | 0.01                 | 1.00  | -1.00 | CDKN1A             | 0.90                  | 0.61 | 0.22 | 0.58                              |
| INSR        | IR (Phospho-Tyr1361)                | -0.78                | 1.13  | -0.35 | INSR               | 0.07                  | 0.73 | 0.73 | 0.68                              |
| NFKB1       | NFkB-p105/p50 (Phospho-Ser932)      | -1.01                | 0.99  | 0.02  | NF-kB              | 0.00                  | 1.00 | 0.00 | 0.86                              |
| PDPK1       | PDK1 (Phospho-Ser241)               | -1.08                | 0.18  | 0.90  | PDK1               | 0.00                  | 1.00 | 1.00 | 0.93                              |
| PTEN        | PTEN (Phospho-Ser380/Thr382/Thr383) | 0.71                 | -1.14 | 0.43  | PTEN               | 0.71                  | 0.35 | 0.27 | 0.47                              |
| TSC2        | Tuberin/TSC2 (Ab-981)               | 1.13                 | -0.35 | -0.78 | TSC2               | 0.87                  | 0.57 | 0.50 | 1.00                              |
| MAP2K1      | MEK1 (Phospho-Thr291)               | 1.14                 | -0.70 | -0.44 | MAP2K3/MAP2K6      | 1.00                  | 1.00 | 0.00 | 0.38                              |
| MAP2K2      | MEK2 (Phospho-Thr394)               | 1.13                 | -0.38 | -0.76 | MAP2K3/MAP2K6      | 1.00                  | 1.00 | 0.00 | 0.65                              |

**Table S7. Potential senescence-reversing targets from the ensemble model simulation and supporting evidences.**

| Gene symbol | Organism     | Genetic manipulation | Rejuvenation effect                                                                                           | PMID     | $S_{[node]}$ |
|-------------|--------------|----------------------|---------------------------------------------------------------------------------------------------------------|----------|--------------|
| PDK1        | -            | -                    | -                                                                                                             | -        | 0.48         |
| PIK3CA      | Mus musculus | Suppression          | preserved cardiac function,<br>enhanced autophagy,<br>prevented lipofuscin accumulation<br>extended lifespan, | 19822807 | 0.4194       |
| AKT1        | Mus musculus | Genetic reduction    | decreased oxidative stress,<br>reduced mitochondrial DNA content                                              | 23935948 | 0.3206       |
| IRS1        | Mus musculus | Knockout             | extended lifespan,<br>delayed age-related processes,                                                          | 17928362 | 0.2692       |
| IGF1R       | Mus musculus | Knockout             | extended lifespan,<br>decreased oxidative stress                                                              | 12483226 | 0.2062       |
| KRAS        | -            | -                    | -                                                                                                             | -        | 0.1822       |
| INSR        | Mus musculus | Knockout             | extended lifespan,<br>reduced fat mass                                                                        | 12543978 | 0.0882       |

**Table S8. Transition trajectory from senescence attractor to quiescence attractor by PDK1 inhibition in the 2401 Boolean network models in which PDK1 is the senescence-reversing target (see the Methods section for more details)**

| Step<br>Node  | Step1 | Step2 | Step3 | Step4 | Step5 | Step6 | Step7 | Step8 | Step9 | Step10 |
|---------------|-------|-------|-------|-------|-------|-------|-------|-------|-------|--------|
| AKT1          | 0     | 0     | -0.19 | -0.77 | -1    | -1    | -1    | -1    | -1    | -1     |
| AMPK          | 0     | 0     | 0     | 0     | 0     | 0     | 0     | 0     | 0     | 0      |
| ATM/ATR       | 0     | 0     | 0     | 0     | 0     | 0     | 0.02  | 0.04  | 0.04  | 0.04   |
| CDK2/4/6      | 0     | 0     | 0     | 0     | 0     | 0     | -0.02 | -0.03 | -0.03 | -0.03  |
| CDKN1A        | 0     | 0     | 0     | 0     | 0.09  | 0.20  | 0.25  | 0.27  | 0.27  | 0.27   |
| CDKN2A        | 0     | 0     | 0     | 0     | 0     | 0     | 0     | 0     | 0     | 0      |
| DNA damage    | 0     | 0     | 0     | 0     | 0     | 0     | 0     | 0     | 0     | 0      |
| E2F1          | 0     | 0     | 0     | 0     | 0     | 0     | 0     | 0     | 0     | 0      |
| EIF4EBP1      | 0     | 0     | 0     | 0     | 0     | 0.10  | 0.49  | 0.86  | 0.96  | 1      |
| FOXO3         | 0     | 0     | 0     | 0     | 0.10  | 0.22  | 0.26  | 0.27  | 0.28  | 0.29   |
| IGF1          | 0     | 0     | 0     | 0     | 0     | 0     | 0     | 0     | 0     | 0      |
| IGF1R         | 0     | 0     | 0     | 0     | 0     | 0     | 0     | 0     | 0     | 0      |
| IKBKB         | 0     | 0     | -0.10 | -0.53 | -0.92 | -1    | -1    | -1    | -1    | -1     |
| IL1B          | 0     | 0     | 0     | 0     | 0     | 0     | -0.01 | -0.06 | -0.46 | -1     |
| IL6           | 0     | 0     | 0     | 0     | 0     | 0     | -0.01 | -0.06 | -0.46 | -1     |
| INSR          | 0     | 0     | 0     | 0     | 0     | 0     | 0     | 0     | 0     | 0      |
| IRS1          | 0     | 0     | 0     | 0     | 0     | 0     | 0     | 0     | 0     | 0      |
| KRAS          | 0     | 0     | 0     | 0     | 0     | 0     | 0     | 0     | 0     | 0      |
| MAP2K3/MAP2K6 | 0     | 0     | 0     | 0     | 0     | 0     | 0     | 0     | 0     | 0      |
| MAPK1         | 0     | 0     | 0     | 0     | 0     | 0     | -0.01 | -0.03 | -0.09 | -0.17  |
| MAPK14        | 0     | 0     | 0     | 0     | 0     | 0     | 0     | 0     | 0     | 0      |
| MDM2          | 0     | 0     | 0     | 0     | 0     | 0     | 0     | 0     | 0     | 0      |
| MTOR          | 0     | 0     | 0     | -0.01 | -0.33 | -0.79 | -0.94 | -0.98 | -1    | -1     |
| NAD+          | 0     | 0     | 0     | 0     | 0     | 0     | 0     | 0     | 0     | 0      |
| NF-kB         | 0     | 0     | 0     | 0     | 0     | -0.03 | -0.31 | -0.84 | -1    | -1     |
| NFKBIE        | 0     | 0     | 0     | 0     | 0.21  | 0.69  | 1     | 1     | 1     | 1      |
| PDK1          | 0     | -0.59 | -1    | -1    | -1    | -1    | -1    | -1    | -1    | -1     |
| PIK3CA        | 0     | 0     | 0     | 0     | 0     | 0     | 0     | 0     | 0     | 0      |
| PPARGC1A      | 0     | 0     | 0     | 0     | 0     | -0.01 | -0.06 | -0.11 | -0.12 | -0.13  |
| PTEN          | 0     | 0     | 0     | 0     | 0.10  | 0.28  | 0.36  | 0.36  | 0.36  | 0.36   |
| RB1           | 0     | 0     | 0     | 0     | 0     | 0     | 0     | 0     | 0     | 0      |
| RHEB          | 0     | 0     | 0     | 0     | 0     | -0.03 | -0.08 | -0.10 | -0.10 | -0.10  |
| ROS           | 0     | 0     | 0     | 0     | 0     | 0     | 0     | 0     | -0.01 | -0.02  |
| S6K1          | 0     | 0     | 0     | 0     | 0     | -0.10 | -0.49 | -0.86 | -0.96 | -1     |
| SGK1          | 0     | 0     | -0.05 | -0.21 | -0.27 | -0.27 | -0.27 | -0.27 | -0.27 | -0.27  |
| SIRT1         | 0     | 0     | 0     | 0     | 0     | 0     | 0     | 0     | 0     | 0      |
| SOD2          | 0     | 0     | 0     | 0     | 0     | 0.01  | 0.04  | 0.07  | 0.07  | 0.08   |
| TP53          | 0     | 0     | 0     | 0     | 0     | 0     | 0     | 0     | 0     | 0      |
| TSC2          | 0     | 0     | 0     | 0     | 0.11  | 0.23  | 0.26  | 0.26  | 0.26  | 0.26   |
| ULK1          | 0     | 0     | 0     | 0     | 0     | 0.10  | 0.49  | 0.86  | 0.96  | 1      |
| Low nutrition | 0     | 0     | 0     | 0     | 0     | 0     | 0     | 0     | 0     | 0      |

**Table S9. Average node activities of input nodes, positive feedback nodes, and output nodes for each simulation condition.** Each of the Boolean networks with the positive feedback loop was given senescence input (DNA damage ON, IGF-1 ON, and low nutrition OFF) to induce the network to its senescence attractor. From the senescence attractor, IGF-1 was turned off and the positive feedback loop was either kept intact or disabled. The positive feedback was disabled by removing the inhibitory regulation of PTEN on PDK1.

| Node     |               | Simulation condition     |                                |                                  |
|----------|---------------|--------------------------|--------------------------------|----------------------------------|
|          |               | IGF-1 on<br>(Senescence) | IGF-1 off &<br>feedback intact | IGF-1 off &<br>feedback disabled |
| Input    | DNA damage    | 1.00                     | 1.00                           | 1.00                             |
|          | IGF-1         | 1.00                     | 0.00                           | 0.00                             |
|          | Low nutrition | 0.00                     | 0.00                           | 0.00                             |
| Feedback | PDK1          | 1.00                     | 1.00                           | 0.39                             |
|          | AKT           | 1.00                     | 1.00                           | 0.39                             |
|          | IKBKB         | 1.00                     | 1.00                           | 0.37                             |
|          | PTEN          | 0.00                     | 0.00                           | 0.63                             |
| Output   | E2F1          | 0.00                     | 0.00                           | 0.00                             |
|          | 4E-BP1        | 0.00                     | 0.00                           | 0.38                             |
|          | IL-6          | 1.00                     | 1.00                           | 0.37                             |
|          | IL-8          | 1.00                     | 1.00                           | 0.37                             |
|          | S6K1          | 1.00                     | 1.00                           | 0.62                             |
|          | ULK1          | 0.00                     | 0.00                           | 0.27                             |

**Table S10. Signal flow strength for each attractor (see the Methods section for more details)**

| Source node   | Target node   | Signal flow strength |            |               |                              |
|---------------|---------------|----------------------|------------|---------------|------------------------------|
|               |               | Senescence           | Quiescence | Proliferation | Senescence + PDK1 Inhibition |
| AKT           | CDKN1A        | -8.85816             | 8.85816    | -8.85816      | 8.88738                      |
| AKT           | FOXO3         | -8.7279              | 8.727899   | -8.7279       | 8.677199                     |
| AKT           | IKBKB         | 7.412393             | -7.41239   | 7.412393      | -7.41116                     |
| AKT           | MDM2          | 8.926647             | -8.92665   | 8.926647      | -9.06267                     |
| AKT           | mTOR          | 9.169929             | -9.16993   | 9.169929      | -10.2393                     |
| AKT           | PTEN          | -8.24408             | 8.244079   | -8.24408      | 8.191513                     |
| AKT           | TSC2          | -8.62246             | 8.622461   | -8.62246      | 8.627773                     |
| AMPK          | FOXO3         | -2.49898             | 8.268279   | -4.76761      | 4.22821                      |
| AMPK          | mTOR          | 2.934835             | -9.71037   | 5.599141      | -4.49422                     |
| AMPK          | NAD           | -2.50862             | 8.300169   | -4.786        | 4.212768                     |
| AMPK          | PPARGC1A      | -2.4988              | 8.267672   | -4.76726      | 4.206369                     |
| AMPK          | TP53          | -2.47324             | 8.183096   | -4.71849      | 4.033958                     |
| AMPK          | TSC2          | -2.48844             | 8.233407   | -4.7475       | 4.186648                     |
| AMPK          | ULK1          | -2.79548             | 9.249304   | -5.33328      | 4.293767                     |
| ATM/ATR       | TP53          | 5.699782             | 6.967192   | -1.78363      | 6.685988                     |
| CDK4          | RB1           | 7.686444             | 8.249182   | -1.95205      | 8.318438                     |
| CDKN1A        | CDK4          | -1.7329              | -6.9351    | 5.003052      | -6.79736                     |
| CDKN2A        | CDK4          | -9.04036             | -8.97889   | 9.04036       | -9.04018                     |
| CDKN2A        | MDM2          | -12.6043             | -12.5186   | 12.60427      | -12.5051                     |
| DNA damage    | ATM/ATR       | 8.790273             | 8.790273   | -8.79027      | 8.795818                     |
| DNA damage    | MAP2K3/MAP2K6 | 10.1429              | 10.1429    | -10.1429      | 10.19209                     |
| DNA damage    | ROS           | 9.087676             | 9.087676   | -9.08768      | 9.09129                      |
| FOXO3         | ATM/ATR       | -2.55056             | 5.225872   | -7.4888       | 3.83694                      |
| FOXO3         | CDKN1A        | -2.56957             | 5.264828   | -7.54462      | 3.870794                     |
| FOXO3         | SOD2          | -2.57358             | 5.273048   | -7.5564       | 3.898509                     |
| IGF-1         | IGF1R         | 11.35549             | -11.3555   | 11.35549      | 11.29168                     |
| IGF1R         | IRS1          | 10.86436             | -10.8644   | 10.86436      | 10.81207                     |
| IGF1R         | KRAS          | 9.021828             | -9.02183   | 9.021828      | 9.074819                     |
| IKBKB         | IRS1          | -6.49986             | 6.499863   | 6.499863      | 6.388083                     |
| IKBKB         | NFKBIE        | -11.0913             | 11.09129   | 11.09129      | 11.08846                     |
| IKBKB         | PTEN          | -8.49735             | 8.497353   | 8.497353      | 8.377729                     |
| INSR          | IRS1          | 4.186011             | -8.23548   | 4.186011      | 4.466589                     |
| INSR          | KRAS          | 3.74234              | -7.36261   | 3.74234       | 4.062817                     |
| IRS1          | PIK3CA        | 9.575458             | -9.57546   | 9.575458      | 9.543578                     |
| KRAS          | MAPK1         | 6.725098             | -2.52709   | 6.725098      | 6.883251                     |
| KRAS          | PIK3CA        | 6.68477              | -2.51194   | 6.68477       | 6.923768                     |
| Low nutrition | AMPK          | -9.88968             | 9.88968    | -9.88968      | -8.79175                     |
| Low nutrition | INSR          | 9.970217             | -9.97022   | 9.970217      | 9.934797                     |
| MAP2K3/MAP2K6 | MAPK14        | 10.94359             | 10.86917   | -10.9436      | 10.85126                     |
| MAPK1         | FOXO3         | -7.15862             | -1.74711   | -4.11942      | -4.16587                     |
| MAPK14        | CDKN2A        | 11.03871             | 10.96364   | -11.0387      | 11.03953                     |
| MAPK14        | FOXO3         | 8.804164             | 8.744296   | -8.80416      | 8.778331                     |
| MAPK14        | TP53          | 9.548533             | 9.483603   | -9.54853      | 9.600048                     |
| MDM2          | FOXO3         | 8.776131             | 8.776131   | -8.77613      | 8.722368                     |
| MDM2          | RB1           | 9.605402             | 9.605402   | -9.6054       | 9.666615                     |
| MDM2          | TP53          | 9.244761             | 9.244761   | -9.24476      | 9.318338                     |
| mTOR          | 4E-BP1        | -9.94088             | 9.940882   | -9.94088      | 9.933993                     |
| mTOR          | PPARGC1A      | 8.591735             | -8.59173   | 8.591735      | -8.60965                     |
| mTOR          | S6K1          | 9.650598             | -9.6506    | 9.650598      | -9.52228                     |
| mTOR          | ULK1          | -9.71722             | 9.717216   | -9.71722      | 10.34199                     |
| NAD           | SIRT1         | 0.991916             | 4.231252   | 0.457808      | 2.960464                     |
| NF-κB         | IL-8          | 11.46127             | -11.4613   | -11.4613      | -11.5108                     |
| NF-κB         | IL-6          | 11.35748             | -11.3575   | -11.3575      | -11.3789                     |
| NF-κB         | MAPK1         | 8.597407             | -8.59741   | -8.59741      | -8.56596                     |
| NFKBIE        | NF-κB         | 10.20835             | -10.2084   | -10.2084      | -10.1574                     |
| PDK1          | AKT           | 10.63599             | -10.636    | 10.63599      | -10.6226                     |
| PDK1          | IKBKB         | 8.219922             | -8.21992   | 8.219922      | -8.30452                     |
| PDK1          | SGK1          | 8.682422             | -8.68242   | 8.682422      | -8.73291                     |

|        |               |          |          |          |          |
|--------|---------------|----------|----------|----------|----------|
| PIK3CA | PDK1          | 11.21337 | -11.0922 | 11.21337 | 11.34765 |
| PTEN   | PDK1          | 2.712023 | -3.56157 | 3.72168  | -3.45902 |
| RB1    | E2F1          | -10.2671 | -10.2671 | 10.26714 | -10.1665 |
| RHEB   | mTOR          | -2.42029 | -4.80313 | -2.25349 | -4.6378  |
| ROS    | MAP2K3/MAP2K6 | 2.01148  | 1.555544 | -4.46213 | 1.571911 |
| SGK1   | FOXO3         | -4.47882 | 0.041122 | -4.47882 | 0.127836 |
| SIRT1  | FOXO3         | 1.325072 | 2.450522 | 1.280329 | 2.024272 |
| SIRT1  | NF-κB         | -1.17371 | -2.17061 | -1.13408 | -1.79326 |
| SIRT1  | PPARGC1A      | 1.343995 | 2.485518 | 1.298613 | 2.075555 |
| SIRT1  | TP53          | -1.32104 | -2.44306 | -1.27643 | -2.0642  |
| SIRT1  | TSC2          | 1.344805 | 2.487016 | 1.299396 | 2.071134 |
| SOD2   | ROS           | -1.87893 | -3.81063 | -0.77057 | -3.53659 |
| TP53   | CDKN1A        | 8.843193 | 8.843193 | -8.84319 | 8.772799 |
| TP53   | IGF1R         | -8.08894 | -8.08894 | 8.088937 | -8.10991 |
| TP53   | MDM2          | 4.782981 | 4.782981 | -4.78298 | 4.713162 |
| TP53   | PTEN          | 8.837121 | 8.837121 | -8.83712 | 8.88597  |
| TSC2   | RHEB          | 0.678449 | -6.70911 | 1.285104 | -5.97605 |
| E2F1   | IKBKB         | 10.54144 | 10.54144 | -10.5414 | 10.65375 |
| TP53   | AMPK          | 7.283479 | 7.283479 | -7.28348 | 8.500481 |



**Dataset S1 (separate file).** Phosphoprotein array data. Mean fold change between control and treated sample was calculated from quantile normalized values of four samples. Raw intensities of four replicates were also provided.

**Dataset S2 (separate file).** GO enrichment analysis of phosphoprotein array. For each condition and each time point, we selected genes with log<sub>2</sub>-transformed quantile normalized raw intensities greater than 13 for GO enrichment analysis. We used EnrichR (4) to perform gene ontology (GO)-term analysis. Adjusted p-value cut-off is 0.001.

### SI References

1. V. Pant *et al.*, The p53–Mdm2 feedback loop protects against DNA damage by inhibiting p53 activity but is dispensable for p53 stability, development, and longevity. *Genes & development* **27**, 1857-1867 (2013).
2. X. Wu, J. H. Bayle, D. Olson, A. J. Levine, The p53-mdm-2 autoregulatory feedback loop. *Genes & development* **7**, 1126-1132 (1993).
3. Z.-W. Li *et al.*, The IKK $\beta$  subunit of I $\kappa$ B kinase (IKK) is essential for nuclear factor  $\kappa$ B activation and prevention of apoptosis. *The Journal of experimental medicine* **189**, 1839-1845 (1999).
4. E. Y. Chen *et al.*, Enrichr: interactive and collaborative HTML5 gene list enrichment analysis tool. *BMC bioinformatics* **14**, 128 (2013).
